# Supplementary material for: Bovine Mammary Gene Expression Profiling during the Onset of Lactation
Source: PLoS One. 2013 Aug 21;8(8):e70393. doi: 10.1371/journal.pone.0070393 (PMC3749150; doi:10.1371/journal.pone.0070393)
Supplement: File S1 — The details of differentially expressed genes at −7 d compared with −35 d. (XLS) [file pone.0070393.s001.xls]

## Sheet: Sheet1
Gene	TPM（-35d）	TPM(-7d)	log2 Ratio(-7d/-35d)	P-Value	FDR	Description
gi|83035074|ref|NM_001037608.1|	0.01	5.18	9.01681	7.9674e-10	8.7661e-09	Bos taurus transmembrane protein 126A (TMEM126A), mRNA
gi|50872132|ref|NM_001002884.1|	0.01	3.04	8.24793	4.58356e-06	2.92741e-05	Bos taurus killer cell lectin-like receptor family J member 1 (KLRJ1), mRNA
gi|116004130|ref|NM_001076958.1|	0.01	3.04	8.24793	4.58356e-06	2.92532e-05	Bos taurus transmembrane protein 88B (TMEM88B), mRNA
gi|139948615|ref|NM_001083747.1|	0.01	2.15	7.74819	0.000168974	0.000776624	Bos taurus GDNF family receptor alpha 3 (GFRA3), mRNA
gi|31342165|ref|NM_174378.2|	3.72	198.63	5.73864	1.61306e-09	1.70973e-08	Bos taurus lactalbumin, alpha- (LALBA), mRNA
gi|157428139|ref|NM_001105511.1|	2.54	110.13	5.43824	1.13174e-07	9.251e-07	Bos taurus ribonuclease, RNase A family, 2 (liver, eosinophil-derived neurotoxin) (RNASE2), mRNA
gi|254304478|ref|NM_001163414.1|	1.01	33.97	5.07183	1.90467e-05	0.000107552	Bos taurus histatherin (HSTN), mRNA
gi|31342355|ref|NM_174313.2|	1.52	46.31	4.92918	3.73596e-06	2.42405e-05	Bos taurus fatty acid binding protein 3, muscle and heart (mammary-derived growth inhibitor) (FABP3), mRNA
gi|125991745|ref|NM_001012676.2|	0.51	13.95	4.77362	7.97426e-05	0.000393968	Bos taurus major histocompatibility complex, class II, DQ beta (BOLA-DQB), mRNA
gi|31341233|ref|NM_174828.2|	4.06	94.22	4.53648	4.72336e-10	5.34777e-09	Bos taurus glycosylation-dependent cell adhesion molecule 1 (GLYCAM1), mRNA
gi|31341348|ref|NM_181029.2|	578.92	10599.4	4.19448	0	0	Bos taurus casein alpha s1 (CSN1S1), mRNA
gi|87196496|ref|NM_173929.3|	757.13	13817.2	4.18978	1.53857e-11	2.01996e-10	Bos taurus progestagen-associated endometrial protein (PAEP), mRNA
gi|31341343|ref|NM_181008.2|	735.32	12496.2	4.08697	2.43708e-11	3.13534e-10	Bos taurus casein beta (CSN2), mRNA
gi|31341749|ref|NM_174528.2|	22.49	304.12	3.75729	9.63674e-14	1.83078e-12	Bos taurus casein alpha-S2 (CSN1S2), mRNA
gi|78369383|ref|NM_001035330.1|	0.34	4.29	3.65737	0.000124308	0.000590086	Bos taurus glycoprotein A33 (transmembrane) (GPA33), mRNA
gi|148540093|ref|NM_173959.4|	74.73	796.32	3.41359	0	0	Bos taurus stearoyl-CoA desaturase (delta-9-desaturase) (SCD), mRNA
gi|31341801|ref|NM_174508.2|	4.4	42.55	3.27358	1.38304e-10	1.6669e-09	Bos taurus butyrophilin, subfamily 1, member A1 (BTN1A1), mRNA
gi|32189337|ref|NM_174143.1|	144.56	1389.54	3.26487	0	0	Bos taurus polymeric immunoglobulin receptor (PIGR), mRNA
gi|156120566|ref|NM_001101959.1|	5.58	51.49	3.20596	2.16182e-12	3.13167e-11	Bos taurus major facilitator superfamily domain containing 2A (MFSD2A), mRNA
gi|297484404|ref|XM_002694284.1|	0.51	4.29	3.07241	9.43348e-05	0.000458482	PREDICTED: Bos taurus receptor-type tyrosine-protein phosphatase V-like (LOC100300760), mRNA
gi|115495206|ref|NM_001075949.1|	0.51	4.29	3.07241	9.43348e-05	0.000458234	Bos taurus hairy and enhancer of split 6 (Drosophila) (HES6), mRNA
gi|156120560|ref|NM_001101956.1|	0.51	3.93	2.94596	0.000129224	0.00061019	Bos taurus similar to Myeloid-associated differentiation marker (MGC152278), mRNA
gi|149643102|ref|NM_001099040.1|	6.09	46.31	2.92681	4.79394e-13	7.9606e-12	Bos taurus WD repeat domain, phosphoinositide interacting 1 (WIPI1), mRNA
gi|119331227|ref|NM_001079794.1|	5.92	44.7	2.91661	7.5473e-13	1.17699e-11	Bos taurus aquaporin 3 (Gill blood group) (AQP3), mRNA
gi|114052269|ref|NM_001046356.1|	2.2	16.45	2.90251	3.71264e-07	2.8333e-06	Bos taurus chordin-like 2 (CHRDL2), mRNA
gi|297461544|ref|XM_002701707.1|	2.71	19.31	2.83298	6.21268e-08	5.29051e-07	PREDICTED: Bos taurus hypothetical protein LOC100336001 (LOC100336001), mRNA
gi|115496891|ref|NM_001076376.1|	33.31	183.79	2.46403	0	0	Bos taurus NME1-NME2 readthrough (NME1-NME2), mRNA
gi|77735480|ref|NM_001034263.1|	0.85	4.65	2.4517	9.14448e-05	0.000446372	Bos taurus testis expressed 12 (TEX12), mRNA
gi|84000104|ref|NM_001038067.1|	2.37	12.69	2.42073	2.05442e-07	1.62308e-06	Bos taurus calcium binding tyrosine-(Y)-phosphorylation regulated (CABYR), mRNA
gi|156120464|ref|NM_001101908.1|	5.07	26.82	2.40325	1.2178e-11	1.61063e-10	Bos taurus transmembrane protein 120B (TMEM120B), mRNA
gi|31341726|ref|NM_174539.2|	509.77	2687.35	2.39827	0	0	Bos taurus Fc fragment of IgG, low affinity IIb, receptor (CD32) (FCGR2), mRNA
gi|84000236|ref|NM_001038128.1|	3.72	19.31	2.37597	1.61306e-09	1.70771e-08	Bos taurus solute carrier family 4, sodium bicarbonate transporter, member 10 (SLC4A10), mRNA
gi|147903999|ref|NM_001098126.1|	4.06	20.74	2.35286	4.72336e-10	5.34103e-09	Bos taurus Y box binding protein 2 (YBX2), mRNA
gi|31341872|ref|NM_174483.2|	0.85	4.29	2.33544	0.0002133	0.000954898	Bos taurus vesicle-associated membrane protein 2 (synaptobrevin 2) (VAMP2), mRNA
gi|134085780|ref|NM_001083449.1|	0.85	4.29	2.33544	0.0002133	0.000954422	Bos taurus cell death-inducing DFFA-like effector a (CIDEA), mRNA
gi|94967005|ref|NM_001040607.1|	2.87	13.95	2.28114	3.40136e-08	3.00789e-07	Bos taurus achaete-scute complex homolog 2 (Drosophila) (ASCL2), mRNA
gi|157785614|ref|NM_001105621.1|	4.9	23.24	2.24576	2.22196e-11	2.87094e-10	Bos taurus R-spondin homolog (Xenopus laevis) (RSPO1), mRNA
gi|134085845|ref|NM_001083512.1|	19.44	91.18	2.22969	0	0	Bos taurus KH domain containing, RNA binding, signal transduction associated 3 (KHDRBS3), mRNA
gi|297492301|ref|XM_002699408.1|	2.37	10.91	2.20269	2.11236e-07	1.663e-06	PREDICTED: Bos taurus leucine-rich repeats and death domain containing (LRDD), mRNA
gi|115495080|ref|NM_001075500.1|	1.52	6.97	2.19709	7.50786e-06	4.58916e-05	Bos taurus sparc/osteonectin, cwcv and kazal-like domains proteoglycan (testican) 1 (SPOCK1), mRNA
gi|164420750|ref|NM_001024476.2|	1.52	6.97	2.19709	7.50786e-06	4.58603e-05	Bos taurus TRAF3 interacting protein 3 (TRAF3IP3), transcript variant 2, mRNA
gi|115495208|ref|NM_001075950.1|	1.52	6.79	2.15934	1.01093e-05	6.04335e-05	Bos taurus glycoprotein 2 (zymogen granule membrane) (GP2), mRNA
gi|160333256|ref|NM_001014910.2|	2.54	11.26	2.14831	1.18775e-07	9.68235e-07	Bos taurus hemoglobin, beta, epsilon 4 (HBE4), mRNA
gi|156120520|ref|NM_001101936.1|	4.23	18.42	2.12254	2.55622e-10	3.00021e-09	Bos taurus kinesin family member C1 (KIFC1), mRNA
gi|31343121|ref|NM_173980.2|	118.02	509.01	2.10866	3.5083e-14	7.14976e-13	Bos taurus perilipin 2 (PLIN2), mRNA
gi|219522049|ref|NM_001143748.1|	4.23	18.24	2.10838	2.55704e-10	2.99725e-09	Bos taurus hypothetical LOC100196900 (LOC100196900), mRNA
gi|60592789|ref|NM_001012669.1|	660.42	2804.46	2.08627	0	0	Bos taurus fatty acid synthase (FASN), mRNA
gi|31342969|ref|NM_174042.2|	1.52	6.44	2.08299	2.1692e-05	0.000120665	Bos taurus dopamine receptor D1 (DRD1), mRNA
gi|148238308|ref|NM_001097984.1|	79.8	329.33	2.04507	1.60316e-13	2.95186e-12	Bos taurus aldolase C, fructose-bisphosphate (ALDOC), mRNA
gi|114053268|ref|NM_001046279.1|	11.84	48.63	2.03818	0	0	Bos taurus serotransferrin-like (LOC525947), mRNA
gi|148540297|ref|NM_001098461.1|	8.96	36.65	2.03224	5.75096e-14	1.1309e-12	Bos taurus solute carrier family 6 (amino acid transporter), member 14 (SLC6A14), mRNA
gi|125991945|ref|NM_001081607.1|	7.44	30.39	2.03022	8.4821e-14	1.61484e-12	Bos taurus vasoactive intestinal peptide receptor 1 (VIPR1), mRNA
gi|167583503|ref|NM_001114509.1|	250.4	1017.84	2.0232	5.0877e-12	7.06214e-11	Bos taurus trefoil factor 3 (intestinal) (TFF3), mRNA
gi|119331207|ref|NM_001079785.1|	2.87	11.62	2.01749	4.75728e-08	4.11762e-07	Bos taurus chromosome 7 open reading frame 57 ortholog (C4H7orf57), mRNA
gi|297458668|ref|XM_865470.3|	1.52	6.08	2	5.33674e-05	0.000271901	PREDICTED: Bos taurus hexokinase 2-like (LOC614107), mRNA
gi|297475509|ref|XM_002688003.1|	5.07	20.02	1.98138	1.23224e-11	1.62731e-10	PREDICTED: Bos taurus family with sequence similarity 116, member B-like (LOC100139352), mRNA
gi|156121088|ref|NM_001102221.1|	5.41	20.92	1.95118	3.86136e-12	5.43561e-11	Bos taurus YdjC homolog (bacterial) (YDJC), mRNA
gi|148225557|ref|NM_001098023.1|	2.87	11.08	1.94884	9.37126e-08	7.76637e-07	Bos taurus CHK1 checkpoint homolog (S. pombe) (CHEK1), mRNA
gi|27881409|ref|NM_174045.1|	2.03	7.69	1.9215	8.87898e-06	5.35426e-05	Bos taurus desmoglein 1 (DSG1), mRNA
gi|60592801|ref|NM_001012675.1|	3.04	11.44	1.91194	7.24076e-08	6.10799e-07	Bos taurus major histocompatibility complex, class II, DQ alpha 5 (HLA-DQA1), mRNA
gi|116003928|ref|NM_001076854.1|	3.04	11.44	1.91194	7.24076e-08	6.10225e-07	Bos taurus coiled-coil domain containing 99 (CCDC99), mRNA
gi|155372064|ref|NM_001101169.1|	9.64	36.12	1.90569	6.81676e-14	1.32594e-12	Bos taurus solute carrier family 27 (fatty acid transporter), member 6 (SLC27A6), mRNA
gi|297485567|ref|XM_002707748.1|	5.92	22.17	1.90494	7.8848e-13	1.22536e-11	PREDICTED: Bos taurus hypothetical LOC100141222 (LOC100141222), mRNA
gi|116004026|ref|NM_001076906.1|	2.87	10.73	1.90253	1.91821e-07	1.52487e-06	Bos taurus butyrylcholinesterase (BCHE), mRNA
gi|31559776|ref|NM_174761.2|	3.55	13.05	1.87816	1.21212e-08	1.14171e-07	Bos taurus major allergen BDA20 (BDA20), mRNA
gi|118150831|ref|NM_001077858.1|	20.12	73.84	1.87577	0	0	Bos taurus CTP synthase (CTPS), mRNA
gi|115495764|ref|NM_001076169.1|	2.37	8.58	1.85609	4.21262e-06	2.70785e-05	Bos taurus myeloid/lymphoid or mixed-lineage leukemia (trithorax homolog, Drosophila); translocated to, 11 (MLLT11), mRNA
gi|148229207|ref|NM_001098037.1|	2.2	7.87	1.83886	1.21904e-05	7.19153e-05	Bos taurus RecQ protein-like 4 (RECQL4), mRNA
gi|156120382|ref|NM_001101867.1|	15.89	56.32	1.82553	0	0	Bos taurus EMI domain containing 1 (EMID1), mRNA
gi|297489902|ref|XM_002697968.1|	5.75	20.38	1.82552	2.92188e-12	4.16542e-11	PREDICTED: Bos taurus rhomboid protease 1-like (LOC100336895), mRNA
gi|114051038|ref|NM_001046489.1|	1.69	5.9	1.80369	0.000193641	0.000876072	Bos taurus phospholipase C, delta 4 (PLCD4), mRNA
gi|118150915|ref|NM_001077907.1|	10.31	35.58	1.78702	3.79696e-14	7.68563e-13	Bos taurus ATP-binding cassette, sub-family C (CFTR/MRP), member 5 (ABCC5), mRNA
gi|77735788|ref|NM_001034417.1|	6.76	23.24	1.78151	2.5957e-13	4.59993e-12	Bos taurus EBNA1 binding protein 2 (EBNA1BP2), mRNA
gi|164518975|ref|NM_001113301.1|	6.59	22.35	1.76192	7.20534e-13	1.13551e-11	Bos taurus small EDRK-rich factor 1A (telomeric) (SERF1A), mRNA
gi|114051284|ref|NM_001046190.1|	10.48	35.4	1.75611	0	0	Bos taurus ATP-binding cassette, sub-family D (ALD), member 1 (ABCD1), mRNA
gi|157428093|ref|NM_001105485.1|	1.86	6.26	1.75086	0.000166844	0.000767228	Bos taurus 5'-nucleotidase domain containing 1 (NT5DC1), mRNA
gi|115495772|ref|NM_001075540.1|	2.87	9.65	1.74948	2.7152e-06	1.80483e-05	Bos taurus hydroxyacylglutathione hydrolase-like (HAGHL), mRNA
gi|194676406|ref|XM_001251875.2|	2.2	7.33	1.73631	4.88288e-05	0.000251204	PREDICTED: Bos taurus tetratricopeptide repeat domain 23-like (TTC23L), partial mRNA
gi|82617541|ref|NM_001037319.1|	24.69	82.06	1.73275	1.79856e-14	3.78585e-13	Bos taurus solute carrier family 16, member 1 (monocarboxylic acid transporter 1) (SLC16A1), mRNA
gi|83035120|ref|NM_001037629.1|	14.37	47.56	1.72669	0	0	Bos taurus translocase of inner mitochondrial membrane 8 homolog B (yeast) (TIMM8B), nuclear gene encoding mitochondrial protein, mRNA
gi|118601859|ref|NM_001079632.1|	2.37	7.69	1.6981	4.1803e-05	0.000219337	Bos taurus methylmalonic aciduria (cobalamin deficiency) cblB type (MMAB), nuclear gene encoding mitochondrial protein, mRNA
gi|66792773|ref|NM_001024477.1|	5.07	16.09	1.66611	4.24336e-09	4.28976e-08	Bos taurus trophinin associated protein (tastin) (TROAP), mRNA
gi|77736058|ref|NM_001034556.1|	47.34	150.18	1.66556	0	0	Bos taurus solute carrier family 31 (copper transporters), member 2 (SLC31A2), mRNA
gi|134085931|ref|NM_001083424.1|	2.54	8.05	1.66416	3.56148e-05	0.000189193	Bos taurus retinoblastoma binding protein 9 (RBBP9), mRNA
gi|164448571|ref|NM_174166.2|	2.2	6.97	1.66366	0.000121426	0.000577932	Bos taurus retinol dehydrogenase 5 (11-cis/9-cis) (RDH5), mRNA
gi|195539536|ref|NM_001130766.1|	8.79	27.71	1.65647	7.77156e-14	1.48905e-12	Bos taurus RAD54-like (S. cerevisiae) (RAD54L), mRNA
gi|297463577|ref|XM_002702756.1|	4.9	15.38	1.6502	1.19719e-08	1.13002e-07	PREDICTED: Bos taurus hypothetical protein LOC100335716 (LOC100335716), mRNA
gi|154147640|ref|NM_001014386.3|	19.44	60.97	1.64907	0	0	Bos taurus ribonuclease (RNASE1), mRNA
gi|77735418|ref|NM_001034234.1|	8.62	27	1.6472	5.63994e-14	1.1115e-12	Bos taurus solute carrier family 13 (sodium-dependent dicarboxylate transporter), member 2 (SLC13A2), mRNA
gi|75832107|ref|NM_001014951.2|	4.06	12.69	1.64414	2.3918e-07	1.8666e-06	Bos taurus transmembrane protein 171 (TMEM171), mRNA
gi|94966858|ref|NM_001040533.1|	19.61	60.97	1.63651	1.03251e-13	1.94916e-12	Bos taurus thyroid hormone responsive (THRSP), mRNA
gi|157279888|ref|NM_001104990.1|	3.89	11.98	1.62279	6.76878e-07	4.95879e-06	Bos taurus arginine vasopressin receptor 1A (AVPR1A), mRNA
gi|156120668|ref|NM_001102011.1|	3.89	11.8	1.60094	1.04674e-06	7.48493e-06	Bos taurus budding uninhibited by benzimidazoles 1 homolog (yeast) (BUB1), mRNA
gi|194669793|ref|XM_603264.4|	2.54	7.69	1.59816	8.6605e-05	0.000424133	PREDICTED: Bos taurus CG8866-like, transcript variant 1 (TTK), mRNA
gi|269847399|ref|NR_030918.1|	3.55	10.73	1.59576	3.49506e-06	2.28261e-05	Bos taurus microRNA mir-2404-2 (MIR2404-2), microRNA
gi|156120586|ref|NM_001101969.1|	5.58	16.81	1.59098	6.25578e-09	6.13737e-08	Bos taurus centromere protein T (CENPT), mRNA
gi|157427779|ref|NM_001105326.1|	2.87	8.58	1.57993	3.95122e-05	0.000208415	Bos taurus structural maintenance of chromosomes 4 (SMC4), mRNA
gi|77735606|ref|NM_001034327.1|	2.54	7.51	1.56398	0.000134077	0.000631444	Bos taurus nuclear receptor 2C2-associated protein (NR2C2AP), mRNA
gi|27881411|ref|NM_174294.1|	1390.84	4109.25	1.56292	0	0	Bos taurus casein kappa (CSN3), mRNA
gi|87196502|ref|NM_001001855.2|	13.7	40.41	1.56054	3.57492e-14	7.269e-13	Bos taurus baculoviral IAP repeat-containing 5 (BIRC5), mRNA
gi|116004438|ref|NM_001077110.1|	19.61	56.32	1.52206	1.03251e-13	1.94506e-12	Bos taurus adaptor-related protein complex 1, sigma 1 subunit (AP1S1), mRNA
gi|114053086|ref|NM_001046560.1|	35.34	101.37	1.52026	1.77192e-13	3.22942e-12	Bos taurus glutathione S-transferase mu 3 (brain) (GSTM3), mRNA
gi|118150901|ref|NM_001077895.1|	3.38	9.65	1.51351	2.31142e-05	0.000127784	Bos taurus transmembrane 9 superfamily member 2 (TM9SF2), mRNA
gi|164448621|ref|NM_001075678.2|	13.19	37.55	1.50937	0	0	Bos taurus TAR (HIV-1) RNA binding protein 2 (TARBP2), mRNA
gi|115495342|ref|NM_001075797.1|	4.4	12.52	1.50866	1.45526e-06	1.01472e-05	Bos taurus non-SMC element 2, MMS21 homolog (S. cerevisiae) (NSMCE2), mRNA
gi|114050926|ref|NM_001046126.1|	5.41	15.38	1.50736	9.37728e-08	7.76418e-07	Bos taurus elongation factor RNA polymerase II-like 3 (ELL3), mRNA
gi|297468467|ref|XM_002706020.1|	4.23	11.98	1.5019	2.64708e-06	1.76347e-05	PREDICTED: Bos taurus FGFR1 oncogene partner-like (LOC100336051), mRNA
gi|158262748|ref|NM_001109963.1|	4.23	11.98	1.5019	2.64708e-06	1.76217e-05	Bos taurus hypothetical protein LOC100126170 (LOC100126170), mRNA
gi|118151345|ref|NM_001078137.1|	3.55	10.01	1.49555	1.92448e-05	0.000108602	Bos taurus gonadotropin-releasing hormone 1 (luteinizing-releasing hormone) (GNRH1), mRNA
gi|118601869|ref|NM_001079639.1|	9.81	27.35	1.47922	1.94222e-12	2.83647e-11	Bos taurus keratin associated protein (LOC780781), mRNA
gi|297485951|ref|XR_083937.1|	5.92	16.45	1.47442	5.45604e-08	4.69523e-07	PREDICTED: Bos taurus hypothetical LOC100337434 (LOC100337434), miscRNA
gi|82697328|ref|NM_001037449.1|	7.95	21.99	1.46782	3.57124e-10	4.11082e-09	Bos taurus ubiquitin-conjugating enzyme E2C (UBE2C), mRNA
gi|31343144|ref|NM_173972.2|	299.44	827.07	1.46574	4.5488e-12	6.33371e-11	Bos taurus xanthine dehydrogenase (XDH), mRNA
gi|118601777|ref|NM_001079595.1|	4.23	11.62	1.45788	6.05288e-06	3.76134e-05	Bos taurus mitochondrial ribosomal protein S30 (MRPS30), nuclear gene encoding mitochondrial protein, mRNA
gi|115496897|ref|NM_001076487.1|	29.93	82.06	1.45509	0	0	Bos taurus H1 histone family, member 0 (H1F0), mRNA
gi|115749606|ref|NM_183084.2|	6.42	17.52	1.44836	3.1443e-08	2.79989e-07	Bos taurus aurora kinase B (AURKB), mRNA
gi|110350684|ref|NM_174693.2|	14.54	39.33	1.4356	0	0	Bos taurus diacylglycerol O-acyltransferase 1 (DGAT1), mRNA
gi|62751706|ref|NM_001015551.1|	5.92	15.91	1.42626	1.83704e-07	1.46424e-06	Bos taurus aminoadipate aminotransferase (AADAT), mRNA
gi|114052798|ref|NM_001046288.1|	8.12	21.81	1.42544	9.91176e-10	1.08125e-08	Bos taurus kinesin family member 20A (KIF20A), mRNA
gi|62752069|ref|NM_001015630.1|	8.12	21.81	1.42544	9.91176e-10	1.07994e-08	Bos taurus glutathione synthetase (GSS), mRNA
gi|114051454|ref|NM_001046058.1|	4.73	12.69	1.42378	3.43522e-06	2.25173e-05	Bos taurus phenylalanine hydroxylase (PAH), mRNA
gi|149643040|ref|NM_001099153.1|	4.4	11.8	1.42321	7.5231e-06	4.59221e-05	Bos taurus F-box and leucine-rich repeat protein 2 (FBXL2), mRNA
gi|61888867|ref|NM_001013592.1|	22.32	59.36	1.41115	6.79456e-14	1.3245e-12	Bos taurus actin, gamma 2, smooth muscle, enteric (ACTG2), mRNA
gi|297483968|ref|XM_002693961.1|	134.59	357.04	1.40751	4.37872e-13	7.32537e-12	PREDICTED: Bos taurus MOCO sulphurase C-terminal domain containing 1-like (MOSC1), mRNA
gi|110347571|ref|NM_174174.3|	21.3	56.5	1.4074	8.30446e-14	1.58438e-12	Bos taurus retinal outer segment membrane protein 1 (ROM1), mRNA
gi|157427805|ref|NM_001105339.1|	30.27	78.85	1.38122	0	0	Bos taurus acyl-CoA synthetase short-chain family member 2 (ACSS2), mRNA
gi|262073125|ref|NM_001166530.1|	14.88	38.62	1.37597	2.22044e-15	4.92839e-14	Bos taurus low density lipoprotein receptor (LDLR), mRNA
gi|118150817|ref|NM_001077850.1|	36.18	93.86	1.37532	0	0	Bos taurus breast carcinoma amplified sequence 1 (BCAS1), mRNA
gi|115495332|ref|NM_001075143.1|	6.93	17.88	1.36742	8.66388e-08	7.21346e-07	Bos taurus granulysin (GNLY), mRNA
gi|62988301|ref|NM_001017947.1|	6.59	16.98	1.36549	1.88066e-07	1.49635e-06	Bos taurus PDZ and LIM domain 7 (enigma) (PDLIM7), transcript variant 1, mRNA
gi|31342680|ref|NM_174170.2|	3.89	10.01	1.3636	6.65638e-05	0.000333638	Bos taurus regulator of G-protein signaling 9 (RGS9), mRNA
gi|157074083|ref|NM_001103283.1|	17.42	44.52	1.35371	0	0	Bos taurus leucine rich repeat transmembrane neuronal 3 (LRRTM3), mRNA
gi|156120428|ref|NM_001101890.1|	21.81	55.6	1.3501	0	0	Bos taurus G-2 and S-phase expressed 1 (GTSE1), mRNA
gi|134085899|ref|NM_001083393.1|	3.72	9.48	1.34958	0.000120459	0.000573636	Bos taurus Protein FAM83D (FAM83D), mRNA
gi|82697398|ref|NM_001037488.1|	37.54	95.47	1.34662	0	0	Bos taurus cell division cycle associated 7 (CDCA7), mRNA
gi|164519007|ref|NM_001113302.1|	57.99	147.32	1.34508	0	0	Bos taurus sterol regulatory element binding transcription factor 1 (SREBF1), mRNA
gi|149944710|ref|NM_001098857.1|	67.46	171.28	1.34425	0	0	Bos taurus nicotinate phosphoribosyltransferase domain containing 1 (NAPRT1), mRNA
gi|72534809|ref|NM_001031763.1|	15.05	38.08	1.33927	0	0	Bos taurus solute carrier family 25, member 35 (SLC25A35), mRNA
gi|84370194|ref|NM_001038574.1|	6.59	16.63	1.33544	4.06232e-07	3.07399e-06	Bos taurus coiled-coil domain containing 86 (CCDC86), mRNA
gi|115496789|ref|NM_001075313.1|	7.44	18.77	1.33505	7.09786e-08	5.99308e-07	Bos taurus distal-less homeobox 5 (DLX5), mRNA
gi|297472426|ref|XM_002685854.1|	129.68	327	1.33433	0	0	PREDICTED: Bos taurus KAT protein-like (TSTD1), mRNA
gi|115497877|ref|NM_001075609.1|	6.42	16.09	1.32552	7.24564e-07	5.27796e-06	Bos taurus transmembrane and coiled-coil domains 5B (TMCO5B), mRNA
gi|114051571|ref|NM_001046612.1|	7.78	19.49	1.32489	4.7952e-08	4.14644e-07	Bos taurus COP9 constitutive photomorphogenic homolog subunit 7B (Arabidopsis) (COPS7B), mRNA
gi|62460605|ref|NM_001014957.1|	8.79	21.99	1.32291	6.94118e-09	6.76539e-08	Bos taurus pyrroline-5-carboxylate reductase 1 (PYCR1), mRNA
gi|149642810|ref|NM_001098898.1|	6.09	15.2	1.31956	1.57565e-06	1.09187e-05	Bos taurus TPX2, microtubule-associated, homolog (Xenopus laevis) (TPX2), mRNA
gi|134085804|ref|NM_001083375.1|	55.12	137.13	1.3149	6.3105e-13	1.00687e-11	Bos taurus hydroxysteroid (17-beta) dehydrogenase 7 (HSD17B7), mRNA
gi|66792855|ref|NM_001024536.1|	5.75	14.3	1.31438	3.43142e-06	2.25088e-05	Bos taurus coiled-coil alpha-helical rod protein 1 (CCHCR1), mRNA
gi|156120522|ref|NM_001101937.1|	6.93	17.16	1.30812	3.99772e-07	3.02767e-06	Bos taurus dihydrouridine synthase 4-like (S. cerevisiae) (DUS4L), mRNA
gi|115497725|ref|NM_001076122.1|	44.13	108.52	1.29813	1.75193e-13	3.19951e-12	Bos taurus heparan sulfate (glucosamine) 3-O-sulfotransferase 1 (HS3ST1), mRNA
gi|94966961|ref|NM_001040584.1|	45.31	110.67	1.28836	1.03029e-13	1.94907e-12	Bos taurus mitochondrial ribosomal protein S6 (MRPS6), nuclear gene encoding mitochondrial protein, mRNA
gi|31415866|ref|NM_174573.2|	13.19	32.18	1.28672	6.46438e-12	8.84979e-11	Bos taurus peptidoglycan recognition protein 1 (PGLYRP1), mRNA
gi|62751657|ref|NM_001015665.1|	3.89	9.48	1.28512	0.00021268	0.000953074	Bos taurus cyclin E2 (CCNE2), mRNA
gi|114051290|ref|NM_001046139.1|	46.67	113.71	1.28479	8.06022e-14	1.54107e-12	Bos taurus tissue specific transplantation antigen P35B (TSTA3), mRNA
gi|41386718|ref|NM_176610.1|	139.32	338.62	1.28126	9.02612e-13	1.39307e-11	Bos taurus milk fat globule-EGF factor 8 protein (MFGE8), mRNA
gi|148232524|ref|NM_205793.2|	12.17	29.5	1.27739	6.43152e-11	7.99881e-10	Bos taurus diacylglycerol O-acyltransferase 2 (DGAT2), mRNA
gi|77735710|ref|NM_001034382.1|	5.24	12.69	1.27605	1.94638e-05	0.000109493	Bos taurus isovaleryl-CoA dehydrogenase (IVD), nuclear gene encoding mitochondrial protein, mRNA
gi|194668708|ref|XM_867293.3|	4.06	9.83	1.27571	0.000173041	0.000794502	PREDICTED: Bos taurus nuclear factor I/X-like, transcript variant 2 (NFIX), mRNA
gi|115497371|ref|NM_001076516.1|	16.06	38.8	1.27258	5.57332e-14	1.10079e-12	Bos taurus phosphohistidine phosphatase 1 (PHPT1), mRNA
gi|156120846|ref|NM_001102100.1|	239.25	574.8	1.26454	5.6135e-12	7.74404e-11	Bos taurus leukocyte receptor cluster (LRC) member 8 (LENG8), mRNA
gi|148224471|ref|NM_001098061.1|	112.78	270.86	1.26404	0	0	Bos taurus squalene epoxidase (SQLE), mRNA
gi|114052363|ref|NM_001046345.1|	14.2	33.97	1.25837	4.12826e-12	5.77506e-11	Bos taurus inhibitor of kappa light polypeptide gene enhancer in B-cells, kinase epsilon (IKBKE), mRNA
gi|115496715|ref|NM_001075490.1|	18.09	43.27	1.25817	0	0	Bos taurus chromosome 19 open reading frame 60 ortholog (C7H19orf60), mRNA
gi|158519860|ref|NM_001110076.1|	70.34	168.06	1.25656	0	0	Bos taurus complement component 8, gamma polypeptide (C8G), mRNA
gi|66792747|ref|NM_001024490.1|	15.89	37.9	1.25408	1.39444e-13	2.59418e-12	Bos taurus cell division cycle 45 homolog (S. cerevisiae) (CDC45), mRNA
gi|118150923|ref|NM_001077909.1|	40.24	94.94	1.23839	6.62804e-13	1.05006e-11	Bos taurus insulin induced gene 1 (INSIG1), mRNA
gi|155371944|ref|NM_001101107.1|	15.56	36.65	1.23597	1.20481e-12	1.80662e-11	Bos taurus phenylalanyl-tRNA synthetase, alpha subunit (FARSA), mRNA
gi|78369503|ref|NM_001035449.1|	7.44	17.52	1.23563	9.57582e-07	6.87481e-06	Bos taurus cell division cycle associated 3 (CDCA3), mRNA
gi|149642828|ref|NM_001099011.1|	6.09	14.3	1.2315	1.01243e-05	6.04826e-05	Bos taurus NUF2, NDC80 kinetochore complex component, homolog (S. cerevisiae) (NUF2), mRNA
gi|114051500|ref|NM_001046159.1|	19.11	44.7	1.22595	2.44916e-13	4.37482e-12	Bos taurus coiled-coil-helix-coiled-coil-helix domain containing 4 (CHCHD4), nuclear gene encoding mitochondrial protein, mRNA
gi|75812941|ref|NM_001033619.1|	717.4	1668.98	1.21812	7.72782e-12	1.0436e-10	Bos taurus ribosomal protein L18a (RPL18A), mRNA
gi|262050643|ref|NM_001166484.1|	51.4	119.25	1.21415	0	0	Bos taurus v-kit Hardy-Zuckerman 4 feline sarcoma viral oncogene homolog (KIT), mRNA
gi|297463459|ref|XR_083106.1|	12.34	28.61	1.21318	6.53072e-10	7.22975e-09	PREDICTED: Bos taurus inverted formin 2 (INF2), miscRNA
gi|31343512|ref|NM_177497.2|	31.28	72.41	1.21095	0	0	Bos taurus farnesyl diphosphate synthase (FDPS), mRNA
gi|118151355|ref|NM_001078144.1|	40.07	92.61	1.20865	2.78222e-13	4.8443e-12	Bos taurus angiogenin, ribonuclease, RNase A family, 5 (ANG), mRNA
gi|221136869|ref|NM_001144088.1|	90.46	208.47	1.20449	0	0	Bos taurus SH3-domain binding protein 4 (SH3BP4), mRNA
gi|31342017|ref|NM_174432.2|	169.59	390.65	1.20383	5.28244e-13	8.65953e-12	Bos taurus peroxiredoxin 3 (PRDX3), nuclear gene encoding mitochondrial protein, mRNA
gi|78042497|ref|NM_001035017.1|	19.11	43.98	1.20252	2.64678e-13	4.6812e-12	Bos taurus phosphoglycerate dehydrogenase (PHGDH), mRNA
gi|164420741|ref|NM_001046219.2|	9.98	22.88	1.19698	4.53634e-08	3.93779e-07	Bos taurus solute carrier family 5 (sodium-dependent vitamin transporter), member 6 (SLC5A6), mRNA
gi|148235310|ref|NM_001098096.1|	65.26	149.47	1.19559	1.58984e-13	2.93335e-12	Bos taurus claudin 8 (CLDN8), mRNA
gi|154152000|ref|NM_001100303.1|	28.07	64.18	1.19309	1.72529e-13	3.15727e-12	Bos taurus glutaredoxin 5 (GLRX5), nuclear gene encoding mitochondrial protein, mRNA
gi|31343557|ref|NM_177512.2|	18.43	42.02	1.18902	1.28342e-13	2.39759e-12	Bos taurus UDP-Gal:betaGlcNAc beta 1,4- galactosyltransferase, polypeptide 1 (B4GALT1), mRNA
gi|78365252|ref|NM_001035415.1|	82	186.65	1.18664	7.74048e-13	1.20502e-11	Bos taurus enoyl CoA hydratase domain containing 1 (ECHDC1), mRNA
gi|115494945|ref|NM_001075957.1|	67.29	152.86	1.18375	5.92416e-13	9.55431e-12	Bos taurus multiple C2 domains, transmembrane 2 (MCTP2), mRNA
gi|114050952|ref|NM_001046128.1|	30.94	70.26	1.18323	2.72226e-13	4.76768e-12	Bos taurus phosphorylase kinase, gamma 2 (testis) (PHKG2), mRNA
gi|297489908|ref|XM_002697970.1|	10.65	24.14	1.18057	2.85042e-08	2.56366e-07	PREDICTED: Bos taurus WD repeat domain 5B-like (LOC100301213), mRNA
gi|84370120|ref|NM_001038548.1|	30.94	70.08	1.17953	2.72226e-13	4.77701e-12	Bos taurus propionyl CoA carboxylase, beta polypeptide (PCCB), nuclear gene encoding mitochondrial protein, mRNA
gi|115497381|ref|NM_001076417.1|	76.93	174.14	1.17863	2.29816e-13	4.12978e-12	Bos taurus endoplasmic reticulum-golgi intermediate compartment (ERGIC) 1 (ERGIC1), mRNA
gi|115497359|ref|NM_001076415.1|	65.43	148.04	1.17796	6.64136e-13	1.05032e-11	Bos taurus phytanoyl-CoA 2-hydroxylase interacting protein (PHYHIP), mRNA
gi|115495626|ref|NM_001076514.1|	28.91	65.26	1.17463	3.2263e-13	5.53159e-12	Bos taurus mitochondrial ribosomal protein L21 (MRPL21), nuclear gene encoding mitochondrial protein, mRNA
gi|31341485|ref|NM_174630.2|	19.61	43.98	1.16526	2.16272e-13	3.90203e-12	Bos taurus ubiquinol-cytochrome c reductase core protein II (UQCRC2), nuclear gene encoding mitochondrial protein, mRNA
gi|77735780|ref|NM_001034413.1|	9.98	22.35	1.16316	1.28842e-07	1.04554e-06	Bos taurus ankyrin repeat and SOCS box-containing 11 (ASB11), mRNA
gi|167583537|ref|NM_001114526.1|	33.31	74.02	1.15196	0	0	Bos taurus GTP cyclohydrolase I feedback regulator (GCHFR), mRNA
gi|115432047|ref|NM_001011682.2|	15.22	33.79	1.15063	1.17713e-10	1.42833e-09	Bos taurus glycosyltransferase (C3orf39), mRNA
gi|134085784|ref|NM_001083372.1|	20.12	44.52	1.14582	0	0	Bos taurus component of oligomeric golgi complex 7 (COG7), mRNA
gi|115495928|ref|NM_001076243.1|	23.33	51.31	1.13705	1.69642e-13	3.11717e-12	Bos taurus phytanoyl-CoA dioxygenase domain containing 1 (PHYHD1), mRNA
gi|77736382|ref|NM_001034655.1|	13.36	29.32	1.13397	3.03786e-09	3.12391e-08	Bos taurus sigma non-opioid intracellular receptor 1 (SIGMAR1), mRNA
gi|156120676|ref|NM_001102015.1|	34.32	75.27	1.13303	1.94067e-13	3.51555e-12	Bos taurus acyl-CoA oxidase 2, branched chain (ACOX2), mRNA
gi|114051382|ref|NM_001046179.1|	7.27	15.91	1.12991	1.37899e-05	8.02425e-05	Bos taurus RAD51 homolog (RecA homolog, E. coli) (S. cerevisiae) (RAD51), mRNA
gi|297479012|ref|XM_002690484.1|	12.51	27.35	1.12846	1.17967e-08	1.11702e-07	PREDICTED: Bos taurus acidic (leucine-rich) nuclear phosphoprotein 32 family, member A (ANP32A), mRNA
gi|224809446|ref|NM_001145790.1|	8.12	17.7	1.1242	4.87542e-06	3.09617e-05	Bos taurus hypothetical protein LOC100271850 (LOC100271850), transcript variant 3, mRNA
gi|154707885|ref|NM_001098873.1|	32.63	70.98	1.12121	5.55112e-14	1.09883e-12	Bos taurus tubby like protein 2 (TULP2), mRNA
gi|115495032|ref|NM_001075118.1|	21.13	45.95	1.12077	1.71863e-13	3.15152e-12	Bos taurus pyrophosphatase (inorganic) 1 (PPA1), mRNA
gi|115495186|ref|NM_001075134.1|	9.13	19.85	1.12045	1.40683e-06	9.83246e-06	Bos taurus glycine C-acetyltransferase (GCAT), nuclear gene encoding mitochondrial protein, mRNA
gi|115494981|ref|NM_001075960.1|	27.9	60.61	1.11929	0	0	Bos taurus CKLF-like MARVEL transmembrane domain containing 7 (CMTM7), mRNA
gi|116004230|ref|NM_001077006.1|	7.1	15.38	1.11516	2.3855e-05	0.000131636	Bos taurus heat shock transcription factor, Y linked 2 (HSFY2), mRNA
gi|164518977|ref|NM_001113321.1|	71.18	154.11	1.11442	3.70814e-13	6.26194e-12	Bos taurus diazepam binding inhibitor (GABA receptor modulator, acyl-CoA binding protein) (DBI), mRNA
gi|297468673|ref|XM_002706183.1|	15.89	34.33	1.11135	2.77632e-10	3.23315e-09	PREDICTED: Bos taurus transcription elongation factor A protein-like 8-like (LOC100335186), mRNA
gi|297463481|ref|XR_083109.1|	104.66	224.74	1.10255	5.05818e-13	8.32233e-12	PREDICTED: Bos taurus sorting nexin 5 (LOC789829), miscRNA
gi|156120332|ref|NM_001101842.1|	9.64	20.56	1.09274	1.47214e-06	1.02569e-05	Bos taurus chromatin assembly factor 1, subunit A (p150) (CHAF1A), mRNA
gi|115495812|ref|NM_001075452.1|	47.68	101.37	1.08817	7.11876e-13	1.12384e-11	Bos taurus rogdi homolog (Drosophila) (ROGDI), mRNA
gi|115497195|ref|NM_001075275.1|	17.75	37.19	1.0671	2.06722e-10	2.45846e-09	Bos taurus reticulon 4 interacting protein 1 (RTN4IP1), nuclear gene encoding mitochondrial protein, mRNA
gi|126723359|ref|NM_001082425.1|	14.03	29.32	1.06337	1.84785e-08	1.70119e-07	Bos taurus Kruppel-like factor 15 (KLF15), mRNA
gi|148223436|ref|NM_001098131.1|	37.03	77.24	1.06065	3.54828e-13	6.01464e-12	Bos taurus ribosomal protein L22-like 1 (RPL22L1), mRNA
gi|158519824|ref|NM_001110078.1|	24.52	50.6	1.04518	2.86438e-13	4.96806e-12	Bos taurus chromosome 7 open reading frame 50 ortholog (C25H7ORF50), mRNA
gi|156718125|ref|NM_001103098.1|	20.12	41.48	1.04379	4.23296e-11	5.30866e-10	Bos taurus ubiquitin-like with PHD and ring finger domains 1 (UHRF1), mRNA
gi|77736144|ref|NM_001034599.1|	51.91	106.74	1.04002	2.86438e-14	5.89103e-13	Bos taurus chromosome 10 open reading frame 58 ortholog (C28H10orf58), mRNA
gi|77736587|ref|NM_001034795.1|	20.97	43.09	1.03903	2.11648e-11	2.7386e-10	Bos taurus galactose mutarotase (aldose 1-epimerase) (GALM), mRNA
gi|297459117|ref|XM_002684475.1|	16.23	33.25	1.03469	4.58816e-09	4.58152e-08	PREDICTED: Bos taurus hypothetical protein LOC100335527 (LOC100335527), mRNA
gi|148236214|ref|NM_001098125.1|	29.59	60.43	1.03016	3.3551e-13	5.71962e-12	Bos taurus RAN binding protein 10 (RANBP10), mRNA
gi|119927974|ref|XM_001256332.1|	9.64	19.67	1.02889	7.4054e-06	4.53891e-05	PREDICTED: Bos taurus multidrug resistance-associated protein 4 splice-like (LOC789637), partial mRNA
gi|77736599|ref|NM_001034812.1|	109.06	222.23	1.02693	4.8983e-13	8.07409e-12	Bos taurus transmembrane emp24 protein transport domain containing 9 (TMED9), mRNA
gi|134085650|ref|NM_001083473.1|	6.76	13.77	1.02643	0.000188358	0.00085693	Bos taurus cyclin-dependent kinase 18 (CDK18), mRNA
gi|134085662|ref|NM_001083527.1|	25.02	50.78	1.02118	7.21422e-13	1.13491e-11	Bos taurus DEAD (Asp-Glu-Ala-Asp) box polypeptide 21 (DDX21), mRNA
gi|115496909|ref|NM_001076046.1|	88.09	178.43	1.01831	0	0	Bos taurus small nuclear ribonucleoprotein 70kDa (U1) (SNRNP70), mRNA
gi|157427971|ref|NM_001105423.1|	15.39	31.11	1.01539	2.371e-08	2.15626e-07	Bos taurus zinc finger protein 483 (ZNF483), mRNA
gi|262118237|ref|NM_001166558.1|	16.91	34.15	1.01401	5.14814e-09	5.10657e-08	Bos taurus CD320 molecule (CD320), mRNA
gi|115496977|ref|NM_001075299.1|	11.33	22.88	1.01394	1.75244e-06	1.2023e-05	Bos taurus bridging integrator 3 (BIN3), mRNA
gi|155371838|ref|NM_001101054.1|	10.82	21.81	1.01129	3.2546e-06	2.14431e-05	Bos taurus cyclin-dependent kinase inhibitor 2C (p18, inhibits CDK4) (CDKN2C), mRNA
gi|118150811|ref|NM_001077848.1|	71.69	144.46	1.01083	0	0	Bos taurus nuclear receptor binding protein 2 (NRBP2), mRNA
gi|31341944|ref|NM_174457.2|	14.2	28.61	1.01063	9.91726e-08	8.16603e-07	Bos taurus seryl-tRNA synthetase 2, mitochondrial (SARS2), nuclear gene encoding mitochondrial protein, mRNA
gi|84370068|ref|NM_001038522.1|	13.7	27.53	1.00683	1.83288e-07	1.46353e-06	Bos taurus LLP homolog, long-term synaptic facilitation (Aplysia) (LLPH), mRNA
gi|118151375|ref|NM_001078153.1|	8.45	16.98	1.00681	4.35176e-05	0.000227138	Bos taurus cell division cycle 26 homolog (S. cerevisiae) (CDC26), mRNA
gi|77735878|ref|NM_001034464.1|	29.93	60.07	1.00505	0	0	Bos taurus sorting nexin 5 (SNX5), mRNA
gi|115497521|ref|NM_001076548.1|	12.85	25.75	1.0028	5.10864e-07	3.80791e-06	Bos taurus COX assembly mitochondrial protein homolog (S. cerevisiae) (CMC1), nuclear gene encoding mitochondrial protein, mRNA
gi|78369259|ref|NM_001035309.1|	5.41	0.01	-9.07948	5.77518e-10	6.45711e-09	Bos taurus solute carrier family 25, member 48 (SLC25A48), nuclear gene encoding mitochondrial protein, mRNA
gi|116003966|ref|NM_001076874.1|	4.73	0.01	-8.8857	8.27684e-09	7.98907e-08	Bos taurus RUN domain containing 3B (RUNDC3B), mRNA
gi|28603815|ref|NM_176676.1|	4.4	0.01	-8.78136	3.13338e-08	2.79294e-07	Bos taurus ATPase, H+ transporting, lysosomal 42kDa, V1 subunit C1 (ATP6V1C1), mRNA
gi|297484698|ref|XM_002694439.1|	3.55	0.01	-8.47168	8.7375e-07	6.29816e-06	PREDICTED: Bos taurus Transmembrane protein 132C-like (LOC512602), mRNA
gi|114050764|ref|NM_001046472.1|	3.38	0.01	-8.40088	1.70005e-06	1.16905e-05	Bos taurus G protein-coupled receptor 183 (GPR183), mRNA
gi|297479591|ref|XM_002707711.1|	3.38	0.01	-8.40088	1.70005e-06	1.16815e-05	PREDICTED: Bos taurus son of sevenless homolog 1-like (SOS2), mRNA
gi|122692342|ref|NM_001080369.1|	3.04	0.01	-8.24793	6.43592e-06	3.97184e-05	Bos taurus hypothetical protein LOC787473 (MGC139448), mRNA
gi|94966854|ref|NM_001040525.1|	2.87	0.01	-8.16491	1.25223e-05	7.35831e-05	Bos taurus solute carrier family 26 (sulfate transporter), member 2 (SLC26A2), mRNA
gi|27807494|ref|NM_174772.1|	2.87	0.01	-8.16491	1.25223e-05	7.35349e-05	Bos taurus prolyl endopeptidase (PREP), mRNA
gi|155372052|ref|NM_001101163.1|	2.87	0.01	-8.16491	1.25223e-05	7.34868e-05	Bos taurus chemokine (C-C motif) ligand 28 (CCL28), mRNA
gi|114051853|ref|NM_001046410.1|	2.71	0.01	-8.08215	2.43646e-05	0.0001342	Bos taurus tubulin, alpha 3d (TUBA1D), mRNA
gi|157428021|ref|NM_001105449.1|	2.71	0.01	-8.08215	2.43646e-05	0.000134117	Bos taurus serum response factor binding protein 1 (SRFBP1), mRNA
gi|77735964|ref|NM_001034509.1|	2.54	0.01	-7.98868	4.74062e-05	0.000245151	Bos taurus caspase-15 (LOC515736), mRNA
gi|83035070|ref|NM_001037606.1|	2.54	0.01	-7.98868	4.74062e-05	0.000245009	Bos taurus fermitin family member 3 (FERMT3), mRNA
gi|47564063|ref|NM_001001156.1|	2.54	0.01	-7.98868	4.74062e-05	0.000244868	Bos taurus ADAM metallopeptidase domain 12 (ADAM12), mRNA
gi|31340709|ref|NM_174698.2|	2.54	0.01	-7.98868	4.74062e-05	0.000244727	Bos taurus integrin, beta 6 (ITGB6), mRNA
gi|56710326|ref|NM_001008666.1|	2.37	0.01	-7.88874	9.2238e-05	0.00044951	Bos taurus solute carrier family 14 (urea transporter), member 1 (Kidd blood group) (SLC14A1), mRNA
gi|116004048|ref|NM_001076912.1|	2.2	0.01	-7.78136	0.000179467	0.000821062	Bos taurus sodium channel, voltage-gated, type IV, beta (SCN4B), mRNA
gi|62751481|ref|NM_001015534.1|	2.2	0.01	-7.78136	0.000179467	0.000820643	Bos taurus UDP-N-acetyl-alpha-D-galactosamine:polypeptide N-acetylgalactosaminyltransferase 6 (GalNAc-T6) (GALNT6), mRNA
gi|118150981|ref|NM_001077940.1|	2.2	0.01	-7.78136	0.000179467	0.000820225	Bos taurus PAN3 poly(A) specific ribonuclease subunit homolog (S. cerevisiae) (PAN3), mRNA
gi|77736186|ref|NM_001034620.1|	2.2	0.01	-7.78136	0.000179467	0.000819807	Bos taurus CD200 molecule (CD200), mRNA
gi|84000376|ref|NM_001038204.1|	93.84	2.15	-5.44779	1.40168e-140	1.32304e-138	Bos taurus endopin 1b (SERPINA3-3), mRNA
gi|77736400|ref|NM_001034728.1|	6.59	0.36	-4.19421	1.17156e-09	1.26115e-08	Bos taurus thrombospondin 4 (THBS4), mRNA
gi|31342632|ref|NM_174187.2|	5637.24	333.26	-4.08027	0	0	Bos taurus secreted phosphoprotein 1 (SPP1), mRNA
gi|31340626|ref|NM_174725.2|	5.92	0.36	-4.03953	1.37857e-08	1.29036e-07	Bos taurus endothelial PAS domain protein 1 (EPAS1), mRNA
gi|115496803|ref|NM_001075861.1|	5.75	0.36	-3.99749	2.54512e-08	2.30061e-07	Bos taurus SAM domain and HD domain 1 (SAMHD1), mRNA
gi|77735792|ref|NM_001034419.1|	11.33	0.72	-3.97601	2.69148e-15	5.91532e-14	Bos taurus hydroxyprostaglandin dehydrogenase 15-(NAD) (HPGD), mRNA
gi|164259353|ref|NM_001113221.1|	5.41	0.36	-3.90956	8.63764e-08	7.21171e-07	Bos taurus reticulon 4 (RTN4), transcript variant 2, mRNA
gi|115496539|ref|NM_001075130.1|	5.41	0.36	-3.90956	8.63764e-08	7.205e-07	Bos taurus matrix metallopeptidase 7 (matrilysin, uterine) (MMP7), mRNA
gi|78050076|ref|NM_001035055.1|	5.24	0.36	-3.8635	1.58756e-07	1.27674e-06	Bos taurus claudin 11 (CLDN11), mRNA
gi|122692296|ref|NM_001080219.1|	62.56	4.83	-3.69515	2.49576e-74	1.84954e-72	Bos taurus chitinase 3-like 1 (cartilage glycoprotein-39) (CHI3L1), mRNA
gi|129277509|ref|NM_001082610.1|	4.4	0.36	-3.61143	3.24048e-06	2.13814e-05	Bos taurus superoxide dismutase 3, extracellular (SOD3), mRNA
gi|84370046|ref|NM_001038508.1|	4.4	0.36	-3.61143	3.24048e-06	2.13657e-05	Bos taurus chromosome 9 open reading frame 59 (C9ORF59), mRNA
gi|297462063|ref|XR_083012.1|	26.04	2.15	-3.59832	3.86954e-31	1.61387e-29	PREDICTED: Bos taurus myosin binding protein C, fast-type-like (LOC520988), miscRNA
gi|115432041|ref|NM_174071.2|	6.42	0.54	-3.57154	1.52025e-08	1.41265e-07	Bos taurus glycine receptor, beta (GLRB), mRNA
gi|32880220|ref|NM_182652.1|	4.23	0.36	-3.55459	5.88648e-06	3.67066e-05	Bos taurus glutamate dehydrogenase 1 (GLUD1), nuclear gene encoding mitochondrial protein, mRNA
gi|164448617|ref|NM_001046225.2|	4.06	0.36	-3.49541	1.06671e-05	6.35136e-05	Bos taurus progestin and adipoQ receptor family member VI (PAQR6), mRNA
gi|149642892|ref|NM_001098907.1|	3.89	0.36	-3.4337	1.92796e-05	0.000108661	Bos taurus transmembrane protein 8A (TMEM8A), mRNA
gi|148226476|ref|NM_001098028.1|	5.75	0.54	-3.41253	1.61554e-07	1.29691e-06	Bos taurus interleukin 27 receptor, alpha (IL27RA), mRNA
gi|77735388|ref|NM_001034215.1|	5.75	0.54	-3.41253	1.61554e-07	1.29575e-06	Bos taurus DIRAS family, GTP-binding RAS-like 3 (DIRAS3), mRNA
gi|70778745|ref|NM_001025318.1|	5.58	0.54	-3.36923	2.90264e-07	2.24379e-06	Bos taurus zinc finger CCHC-type and RNA binding motif 1 (ZCRB1), mRNA
gi|62751782|ref|NM_001015653.1|	7.27	0.72	-3.33589	4.56294e-09	4.5665e-08	Bos taurus mannosyl (alpha-1,3-)-glycoprotein beta-1,2-N-acetylglucosaminyltransferase (MGAT1), mRNA
gi|297480929|ref|XM_002691713.1|	6.93	0.72	-3.26679	1.45531e-08	1.35935e-07	PREDICTED: Bos taurus ATP-binding cassette, sub-family A (ABC1), member 2 (ABCA2), mRNA
gi|41386783|ref|NM_174238.1|	10.14	1.07	-3.24437	6.8008e-12	9.2679e-11	Bos taurus activated leukocyte cell adhesion molecule (ALCAM), mRNA
gi|148225698|ref|NM_001098073.1|	5.07	0.54	-3.23095	1.66098e-06	1.14481e-05	Bos taurus retinoblastoma-like 2 (p130) (RBL2), mRNA
gi|134085638|ref|NM_001083419.1|	14.71	1.61	-3.19166	1.76201e-16	4.2021e-15	Bos taurus LY6/PLAUR domain containing 3 (LYPD3), mRNA
gi|114051408|ref|NM_001046142.1|	3.21	0.36	-3.1565	0.000199552	0.000899641	Bos taurus general transcription factor IIB (GTF2B), mRNA
gi|297484720|ref|XM_002694565.1|	3.21	0.36	-3.1565	0.000199552	0.000899189	PREDICTED: Bos taurus nuclear receptor co-repressor 2-like (LOC100337057), mRNA
gi|41386706|ref|NM_174484.1|	6.26	0.72	-3.12009	1.44575e-07	1.16583e-06	Bos taurus vascular cell adhesion molecule 1 (VCAM1), mRNA
gi|148806930|ref|NM_176644.2|	36.01	4.29	-3.06935	4.98352e-37	2.38969e-35	Bos taurus cytochrome P450, family 11, subfamily A, polypeptide 1 (CYP11A1), nuclear gene encoding mitochondrial protein, mRNA
gi|154152138|ref|NM_001100374.1|	5.92	0.72	-3.03953	4.49636e-07	3.37679e-06	Bos taurus mesothelin (MSLN), mRNA
gi|123858761|ref|NM_001080217.1|	35	4.47	-2.96901	6.48798e-35	3.01439e-33	Bos taurus microfibrillar-associated protein 4 (MFAP4), mRNA
gi|31342134|ref|NM_174390.2|	5.58	0.72	-2.9542	1.38431e-06	9.73578e-06	Bos taurus matrix metallopeptidase 14 (membrane-inserted) (MMP14), mRNA
gi|155372262|ref|NM_001101274.1|	5.58	0.72	-2.9542	1.38431e-06	9.72815e-06	Bos taurus V-set and transmembrane domain containing 1 (VSTM1), mRNA
gi|31341440|ref|NM_173879.2|	4.06	0.54	-2.91045	5.05068e-05	0.000259093	Bos taurus coagulation factor V (proaccelerin, labile factor) (F5), mRNA
gi|84370150|ref|NM_001038559.1|	4.06	0.54	-2.91045	5.05068e-05	0.000258945	Bos taurus SWI/SNF related, matrix associated, actin dependent regulator of chromatin, subfamily d, member 1 (SMARCD1), mRNA
gi|61316285|ref|NM_001012681.1|	3.89	0.54	-2.84874	8.81828e-05	0.000430918	Bos taurus major histocompatibility complex, class II, DQ alpha 2 (BOLA-DQA2), mRNA
gi|61097916|ref|NM_001012764.1|	5.07	0.72	-2.81592	7.31964e-06	4.49249e-05	Bos taurus cystatin E/M (CST6), mRNA
gi|297464246|ref|XM_002703106.1|	3.72	0.54	-2.78427	0.000153344	0.000710978	PREDICTED: Bos taurus MYC-associated zinc finger protein-like (LOC100296937), partial mRNA
gi|156718133|ref|NM_001103102.1|	4.9	0.72	-2.76671	1.2671e-05	7.41649e-05	Bos taurus sialophorin (SPN), mRNA
gi|116004122|ref|NM_001076954.1|	15.72	2.32	-2.7604	2.39698e-15	5.29402e-14	Bos taurus golgin A7 family, member B (GOLGA7B), mRNA
gi|114052477|ref|NM_001045902.1|	5.92	0.89	-2.73372	1.84908e-06	1.26185e-05	Bos taurus CD68 molecule (CD68), mRNA
gi|156120650|ref|NM_001102002.1|	7.1	1.07	-2.73021	1.59224e-07	1.27936e-06	Bos taurus docking protein 2, 56kDa (DOK2), mRNA
gi|147900114|ref|NM_001098067.1|	7.95	1.25	-2.66903	4.06062e-08	3.54889e-07	Bos taurus EPH receptor B6 (EPHB6), mRNA
gi|297488365|ref|XR_084015.1|	20.12	3.22	-2.6435	1.79421e-18	4.7883e-17	PREDICTED: Bos taurus hypothetical LOC100298308 (LOC100298308), miscRNA
gi|84000164|ref|NM_001038096.1|	152.17	24.49	-2.63542	2.71274e-129	2.45708e-127	Bos taurus complement factor I (CFI), mRNA
gi|62988319|ref|NM_001017954.1|	5.41	0.89	-2.60375	9.24752e-06	5.55781e-05	Bos taurus ATPase, H+ transporting, lysosomal 16kDa, V0 subunit c (ATP6V0C), mRNA
gi|31340694|ref|NM_174703.2|	18.43	3.04	-2.59991	9.52688e-17	2.3214e-15	Bos taurus tenascin XB (TNXB), mRNA
gi|31342836|ref|NM_174105.2|	6.42	1.07	-2.58496	1.35028e-06	9.53384e-06	Bos taurus microtubule-associated protein 4 (MAP4), mRNA
gi|77735806|ref|NM_001034430.1|	9.64	1.61	-2.58197	2.63202e-09	2.72533e-08	Bos taurus PDZ and LIM domain 2 (mystique) (PDLIM2), mRNA
gi|115495516|ref|NM_001075923.1|	11.67	1.97	-2.56654	6.01116e-11	7.4864e-10	Bos taurus ectonucleotide pyrophosphatase/phosphodiesterase 3 (ENPP3), mRNA
gi|297476200|ref|XM_002688497.1|	5.24	0.89	-2.55769	1.57053e-05	9.00443e-05	PREDICTED: Bos taurus mastermind-like 1-like (LOC100336926), mRNA
gi|31340830|ref|NM_174744.2|	5.24	0.89	-2.55769	1.57053e-05	8.99867e-05	Bos taurus matrix metallopeptidase 9 (gelatinase B, 92kDa gelatinase, 92kDa type IV collagenase) (MMP9), mRNA
gi|75832082|ref|NM_176653.3|	5.24	0.89	-2.55769	1.57053e-05	8.99293e-05	Bos taurus ADP-ribosylation factor 1 (ARF1), mRNA
gi|238231448|ref|NM_001101294.2|	4.23	0.72	-2.55459	0.000109631	0.000526266	Bos taurus dual specificity phosphatase 7 (DUSP7), mRNA
gi|115496689|ref|NM_001075699.1|	4.23	0.72	-2.55459	0.000109631	0.000525984	Bos taurus purinergic receptor P2Y, G-protein coupled, 10 (P2RY10), mRNA
gi|115497345|ref|NM_001075125.1|	35.17	6.08	-2.5322	7.95476e-30	3.22762e-28	Bos taurus adaptor-related protein complex 2, beta 1 subunit (AP2B1), mRNA
gi|57527700|ref|NM_001009572.1|	5.07	0.89	-2.51011	2.65722e-05	0.000144935	Bos taurus calcium-dependent phospholipase A2 PLA2G2D1 (PLA2G2D1), mRNA
gi|70778779|ref|NM_001025343.1|	54.61	9.65	-2.50056	7.91406e-45	4.49148e-43	Bos taurus retinol binding protein 1, cellular (RBP1), mRNA
gi|150247128|ref|NM_001099368.1|	4.06	0.72	-2.49541	0.000186055	0.00084774	Bos taurus protocadherin gamma subfamily A, 2 (PCDHGA2), mRNA
gi|194676335|ref|XM_870939.3|	4.06	0.72	-2.49541	0.000186055	0.000847309	PREDICTED: Bos taurus sphingosine kinase 1 (SPHK1), mRNA
gi|77735692|ref|NM_001034368.1|	15.05	2.68	-2.48946	2.58082e-13	4.58262e-12	Bos taurus abhydrolase domain containing 4 (ABHD4), mRNA
gi|134085949|ref|NM_001083532.1|	11.84	2.15	-2.46126	1.21713e-10	1.47487e-09	Bos taurus arachidonate lipoxygenase, epidermal (ALOX12E), mRNA
gi|148540086|ref|NM_173913.2|	4.9	0.89	-2.4609	4.47792e-05	0.000232639	Bos taurus glucosidase, alpha; acid (GAA), mRNA
gi|83035102|ref|NM_001037614.1|	8.79	1.61	-2.4488	3.54166e-08	3.11965e-07	Bos taurus ubiquitin-conjugating enzyme E2H (UBC8 homolog, yeast) (UBE2H), mRNA
gi|157428111|ref|NM_001105494.1|	8.79	1.61	-2.4488	3.54166e-08	3.11659e-07	Bos taurus cortexin 1 (CTXN1), mRNA
gi|114052594|ref|NM_001046316.1|	18.43	3.4	-2.43845	1.1114e-15	2.5103e-14	Bos taurus lectin, galactoside-binding, soluble, 3 binding protein (LGALS3BP), mRNA
gi|103472132|ref|NM_001034465.2|	4.73	0.89	-2.40996	7.51436e-05	0.00037351	Bos taurus cysteine dioxygenase, type I (CDO1), mRNA
gi|116003970|ref|NM_001076877.1|	9.47	1.79	-2.4034	1.47933e-08	1.38035e-07	Bos taurus cold shock domain containing C2, RNA binding (CSDC2), mRNA
gi|118150789|ref|NM_001077837.1|	40.41	7.69	-2.39366	5.311e-32	2.27865e-30	Bos taurus 6-phosphofructo-2-kinase/fructose-2,6-biphosphatase 3 (PFKFB3), mRNA
gi|156120814|ref|NM_001102084.1|	29.76	5.72	-2.37929	8.64828e-24	2.94864e-22	Bos taurus NEL-like 2 (chicken) (NELL2), mRNA
gi|58330903|ref|NM_001010996.1|	6.42	1.25	-2.36065	4.44564e-06	2.8454e-05	Bos taurus ficolin (collagen/fibrinogen domain containing lectin) 2 (hucolin) (FCN2), mRNA
gi|114051519|ref|NM_001046157.1|	58.5	11.44	-2.35435	9.24678e-45	5.21483e-43	Bos taurus spondin 2, extracellular matrix protein (SPON2), mRNA
gi|126723520|ref|NM_001082439.1|	9.98	1.97	-2.34084	1.01817e-08	9.74377e-08	Bos taurus immunoglobulin superfamily, member 8 (IGSF8), mRNA
gi|77736206|ref|NM_001034630.1|	7.1	1.43	-2.3118	1.81001e-06	1.23896e-05	Bos taurus growth factor receptor-bound protein 2 (GRB2), mRNA
gi|31343576|ref|NM_175811.2|	5.24	1.07	-2.29196	5.01466e-05	0.00025754	Bos taurus aldehyde dehydrogenase 6 family, member A1 (ALDH6A1), nuclear gene encoding mitochondrial protein, mRNA
gi|115496078|ref|NM_001075752.1|	6.93	1.43	-2.27684	2.98452e-06	1.97945e-05	Bos taurus eukaryotic translation initiation factor 4H (EIF4H), mRNA
gi|31341940|ref|NM_174460.2|	182.27	37.72	-2.27268	2.90298e-130	2.65623e-128	Bos taurus secreted frizzled-related protein 1 (SFRP1), mRNA
gi|28875792|ref|NM_176872.1|	8.62	1.79	-2.26773	1.82443e-07	1.45808e-06	Bos taurus thrombospondin 2 (THBS2), mRNA
gi|114326289|ref|NM_001001174.2|	11.16	2.32	-2.26614	2.84466e-09	2.93534e-08	Bos taurus purinergic receptor P2Y, G-protein coupled, 12 (P2RY12), mRNA
gi|116004198|ref|NM_001076987.1|	16.23	3.4	-2.25506	7.37762e-13	1.15253e-11	Bos taurus placenta-specific 8 (PLAC8), mRNA
gi|262073117|ref|NM_001166526.1|	5.07	1.07	-2.24437	8.27176e-05	0.000407319	Bos taurus desmocollin 2 (DSC2), mRNA
gi|114051691|ref|NM_001045979.1|	5.07	1.07	-2.24437	8.27176e-05	0.000407096	Bos taurus complement component 6 (C6), mRNA
gi|62751649|ref|NM_001015565.1|	10.99	2.32	-2.24399	4.65206e-09	4.64016e-08	Bos taurus poly(rC) binding protein 1 (PCBP1), mRNA
gi|28461240|ref|NM_175807.1|	53.09	11.26	-2.23723	2.04744e-38	1.02566e-36	Bos taurus cytochrome c oxidase subunit VIIa polypeptide 2 (liver) (COX7A2), nuclear gene encoding mitochondrial protein, mRNA
gi|31341986|ref|NM_174443.2|	28.24	6.08	-2.2156	6.59322e-21	1.93841e-19	Bos taurus prostaglandin E synthase (PTGES), mRNA
gi|156120528|ref|NM_001101940.1|	9.98	2.15	-2.2147	3.03174e-08	2.70773e-07	Bos taurus hypothetical protein LOC511108 (LOC511108), mRNA
gi|115496941|ref|NM_001076050.1|	8.28	1.79	-2.20967	4.8876e-07	3.65226e-06	Bos taurus cytochrome P450, family 2, subfamily U, polypeptide 1 (CYP2U1), mRNA
gi|115496607|ref|NM_001076490.1|	198.67	43.09	-2.20495	1.04756e-136	9.78483e-135	Bos taurus WAP four-disulfide core domain 2 (WFDC2), mRNA
gi|61657915|ref|NM_001012999.2|	10.48	2.32	-2.17544	2.00574e-08	1.83525e-07	Bos taurus met proto-oncogene (hepatocyte growth factor receptor) (MET), mRNA
gi|84000106|ref|NM_001038065.1|	32.12	7.15	-2.16746	5.45378e-23	1.77833e-21	Bos taurus glycoprotein (transmembrane) nmb (GPNMB), mRNA
gi|50582554|ref|NM_001002763.1|	8.79	1.97	-2.15767	3.21332e-07	2.47329e-06	Bos taurus cadherin 1, type 1, E-cadherin (epithelial) (CDH1), mRNA
gi|156120860|ref|NM_001102107.1|	37.2	8.4	-2.14684	4.41808e-26	1.61044e-24	Bos taurus calcitonin receptor-like (CALCRL), mRNA
gi|190360738|ref|NM_001128498.1|	4.73	1.07	-2.14423	0.000221906	0.00098849	Bos taurus BTB (POZ) domain containing 9 (BTBD9), mRNA
gi|94966762|ref|NM_001040470.1|	44.97	10.37	-2.11655	1.05532e-30	4.36085e-29	Bos taurus haptoglobin (HP), mRNA
gi|297468241|ref|XM_001251940.3|	9.3	2.15	-2.11289	2.09562e-07	1.65272e-06	PREDICTED: Bos taurus tumor necrosis factor, alpha-induced protein 2 (TNFAIP2), mRNA
gi|164448597|ref|NM_001035271.2|	26.04	6.08	-2.09859	3.24032e-18	8.62194e-17	Bos taurus Kruppel-like factor 6 (KLF6), mRNA
gi|75832046|ref|NM_173935.2|	91.64	21.99	-2.05913	7.7999e-59	5.21953e-57	Bos taurus midkine (neurite growth-promoting factor 2) (MDK), mRNA
gi|297492311|ref|XM_002699432.1|	11.16	2.68	-2.05803	2.20846e-08	2.01663e-07	PREDICTED: Bos taurus v-Ha-ras Harvey rat sarcoma viral oncogene homolog (LOC100298939), mRNA
gi|297472314|ref|XM_002685791.1|	56.47	13.59	-2.05494	8.4722e-37	4.01959e-35	PREDICTED: Bos taurus neuroblastoma, suppression of tumorigenicity 1 2-like (NBL1), mRNA
gi|115496361|ref|NM_001075732.1|	5.92	1.43	-2.04958	5.54634e-05	0.000281142	Bos taurus chemokine (C-C motif) receptor-like 2 (CCRL2), mRNA
gi|297489208|ref|XM_002697379.1|	28.07	6.79	-2.04755	5.9607e-19	1.63956e-17	PREDICTED: Bos taurus ubiquitin D (UBD), mRNA
gi|115497607|ref|NM_001075194.1|	25.87	6.26	-2.04705	1.37159e-17	3.50399e-16	Bos taurus adducin 3 (gamma) (ADD3), mRNA
gi|167583523|ref|NM_001114513.1|	426.58	103.7	-2.0404	3.95186e-264	4.48561e-262	Bos taurus chromosome 10 open reading frame 116 ortholog (C28H10ORF116), mRNA
gi|155372054|ref|NM_001101164.1|	7.27	1.79	-2.022	8.69682e-06	5.2621e-05	Bos taurus egl nine homolog 3 (C. elegans) (EGLN3), mRNA
gi|114326275|ref|NM_174843.2|	22.49	5.54	-2.02133	3.09662e-15	6.77253e-14	Bos taurus solute carrier organic anion transporter family, member 2B1 (SLCO2B1), mRNA
gi|27806812|ref|NM_173955.1|	70.34	17.34	-2.02024	1.82047e-44	1.01392e-42	Bos taurus pleiotrophin (PTN), mRNA
gi|114703724|ref|NM_174509.3|	7.95	1.97	-2.01276	3.46224e-06	2.26447e-05	Bos taurus calcium channel, voltage-dependent, beta 3 subunit (CACNB3), mRNA
gi|114051971|ref|NM_001046393.1|	5.75	1.43	-2.00755	8.89518e-05	0.000434439	Bos taurus family with sequence similarity 107, member B (FAM107B), mRNA
gi|94966916|ref|NM_001040560.1|	6.42	1.61	-1.99551	3.50542e-05	0.000186325	Bos taurus zinc finger, HIT type 2 (ZNHIT2), mRNA
gi|77736358|ref|NM_001034707.1|	42.61	10.73	-1.98954	4.7183e-27	1.75556e-25	Bos taurus regulator of G-protein signaling 5 (RGS5), mRNA
gi|84579852|ref|NM_001038674.1|	29.08	7.33	-1.98814	6.45824e-19	1.76558e-17	Bos taurus lipopolysaccharide binding protein (LBP), mRNA
gi|254304476|ref|NM_001163413.1|	7.78	1.97	-1.98157	5.51332e-06	3.46447e-05	Bos taurus CD163 molecule (CD163), mRNA
gi|155372196|ref|NM_001101239.1|	135.26	34.33	-1.97819	9.84786e-82	7.61257e-80	Bos taurus gastrin-releasing peptide (GRP), mRNA
gi|56912246|ref|NM_175051.1|	9.13	2.32	-1.97649	8.78232e-07	6.32539e-06	Bos taurus phospholipase A2 receptor 1, 180kDa (PLA2R1), mRNA
gi|77735734|ref|NM_001034394.1|	14.03	3.58	-1.97048	9.55162e-10	1.04323e-08	Bos taurus CD1e molecule (CD1E), mRNA
gi|84000062|ref|NM_001038046.1|	5.58	1.43	-1.96425	0.000141988	0.000663127	Bos taurus 1-acylglycerol-3-phosphate O-acyltransferase 3 (AGPAT3), mRNA
gi|122692570|ref|NM_001080278.1|	105.34	27	-1.96402	1.90807e-63	1.32633e-61	Bos taurus chromosome 20 open reading frame 108 ortholog (C13H20ORF108), mRNA
gi|27806276|ref|NM_174261.1|	61.88	15.91	-1.95954	7.67592e-38	3.74076e-36	Bos taurus calpain, small subunit 1 (CAPNS1), mRNA
gi|56710316|ref|NM_001008663.1|	159.78	41.12	-1.95817	5.97422e-95	5.00662e-93	Bos taurus keratin 5 (KRT5), mRNA
gi|56790294|ref|NM_205782.1|	14.54	3.75	-1.95506	6.09878e-10	6.78508e-09	Bos taurus protein O-fucosyltransferase 2 (POFUT2), mRNA
gi|160707930|ref|NM_001110785.1|	6.93	1.79	-1.9529	2.20522e-05	0.000122517	Bos taurus interleukin 6 receptor (IL6R), mRNA
gi|31342441|ref|NM_174277.2|	15.89	4.11	-1.95091	1.0021e-10	1.22091e-09	Bos taurus clathrin, light chain B (CLTB), mRNA
gi|77735678|ref|NM_001034365.1|	7.61	1.97	-1.9497	8.74724e-06	5.28904e-05	Bos taurus RNA binding motif, single stranded interacting protein 2 (RBMS2), mRNA
gi|31341413|ref|NM_176654.2|	8.96	2.32	-1.94937	1.3897e-06	9.75071e-06	Bos taurus ATPase, H+ transporting, lysosomal 56/58kDa, V1 subunit B1 (ATP6V1B1), mRNA
gi|157279870|ref|NM_001104981.1|	8.96	2.32	-1.94937	1.3897e-06	9.74308e-06	Bos taurus glycoprotein M6B (GPM6B), mRNA
gi|136256366|ref|NM_174035.3|	24.52	6.44	-1.92883	1.3336e-15	2.99709e-14	Bos taurus cytochrome b-245, beta polypeptide (CYBB), mRNA
gi|157785570|ref|NM_001105646.1|	10.14	2.68	-1.91975	3.51166e-07	2.68449e-06	Bos taurus aldehyde dehydrogenase 4 family, member A1 (ALDH4A1), nuclear gene encoding mitochondrial protein, mRNA
gi|114051074|ref|NM_001046014.1|	13.53	3.58	-1.91813	3.72402e-09	3.79469e-08	Bos taurus growth factor receptor-bound protein 7 (GRB7), mRNA
gi|255653004|ref|NM_001163943.1|	7.44	1.97	-1.91711	1.38252e-05	8.03957e-05	Bos taurus T-cell receptor-associated transmembrane adapter 1 (TRAT1), mRNA
gi|31342700|ref|NM_174161.2|	64.76	17.16	-1.91605	2.0984e-38	1.04535e-36	Bos taurus prosaposin (PSAP), mRNA
gi|27806636|ref|NM_174053.1|	27.9	7.51	-1.89338	3.6965e-17	9.23301e-16	Bos taurus fibrillin 1 (FBN1), mRNA
gi|99028968|ref|NM_001040469.2|	240.6	64.9	-1.89035	1.35104e-135	1.24894e-133	Bos taurus complement component 3 (C3), mRNA
gi|116004352|ref|NM_001077067.1|	6.59	1.79	-1.88032	5.49986e-05	0.000278944	Bos taurus component of oligomeric golgi complex 8 (COG8), mRNA
gi|156120598|ref|NM_001101975.1|	5.92	1.61	-1.87854	0.000139609	0.000653379	Bos taurus SEC14-like 1 (S. cerevisiae) (SEC14L1), mRNA
gi|103472137|ref|NM_001014863.2|	8.45	2.32	-1.86483	5.3956e-06	3.39287e-05	Bos taurus glucose-fructose oxidoreductase domain containing 2 (GFOD2), mRNA
gi|115495724|ref|NM_001075546.1|	13.53	3.75	-1.8512	8.9412e-09	8.58413e-08	Bos taurus solute carrier family 43, member 2 (SLC43A2), mRNA
gi|114053142|ref|NM_001046257.1|	22.49	6.26	-1.84505	1.12805e-13	2.11616e-12	Bos taurus nitric oxide synthase trafficker (NOSTRIN), mRNA
gi|114051470|ref|NM_001046060.1|	6.42	1.79	-1.84261	8.6282e-05	0.000422782	Bos taurus GTPase, IMAP family member 4 (GIMAP4), mRNA
gi|125630662|ref|NM_001081519.1|	7.61	2.15	-1.82356	2.11438e-05	0.000117835	Bos taurus DNA-damage-inducible transcript 4-like (DDIT4L), mRNA
gi|114053120|ref|NM_001046260.1|	21.47	6.08	-1.82018	6.59988e-13	1.04745e-11	Bos taurus reticulocalbin 3, EF-hand calcium binding domain (RCN3), mRNA
gi|156139060|ref|NM_001102377.1|	12	3.4	-1.81943	8.49928e-08	7.1028e-07	Bos taurus adenylosuccinate lyase (ADSL), mRNA
gi|125630720|ref|NM_001081545.1|	23.33	6.62	-1.81728	6.9442e-14	1.34781e-12	Bos taurus RAB40C, member RAS oncogene family (RAB40C), mRNA
gi|78369493|ref|NM_001035430.1|	6.93	1.97	-1.81466	5.32694e-05	0.00027171	Bos taurus septin 6 (SEPT6), mRNA
gi|156121130|ref|NM_001102243.1|	6.93	1.97	-1.81466	5.32694e-05	0.000271556	Bos taurus cytohesin 1 interacting protein (CYTIP), mRNA
gi|78369166|ref|NM_001035427.1|	61.38	17.52	-1.80877	7.18616e-34	3.22191e-32	Bos taurus serine incorporator 1 (SERINC1), mRNA
gi|84000124|ref|NM_001038075.1|	8.12	2.32	-1.80735	1.30904e-05	7.64203e-05	Bos taurus B-cell receptor-associated protein 29 (BCAP29), mRNA
gi|297481306|ref|XM_002691974.1|	8.12	2.32	-1.80735	1.30904e-05	7.63706e-05	PREDICTED: Bos taurus integrin, beta-like 1 (with EGF-like repeat domains) (ITGBL1), mRNA
gi|31342229|ref|NM_174357.2|	7.44	2.15	-1.79097	3.28674e-05	0.000175953	Bos taurus interleukin 1 receptor antagonist (IL1RN), mRNA
gi|297483978|ref|XM_002693966.1|	6.76	1.97	-1.77883	8.27916e-05	0.000407237	PREDICTED: Bos taurus tumor protein p53 binding protein, 2 (TP53BP2), mRNA
gi|114052321|ref|NM_001046349.1|	29.42	8.58	-1.77775	1.18095e-16	2.84667e-15	Bos taurus N-acetylgalactosaminidase, alpha- (NAGA), mRNA
gi|125991929|ref|NM_001081592.1|	23.16	6.79	-1.77015	2.43376e-13	4.35599e-12	Bos taurus arrestin domain containing 2 (ARRDC2), mRNA
gi|77735682|ref|NM_001034367.1|	240.94	71.51	-1.75246	1.44184e-122	1.29289e-120	Bos taurus S100 calcium binding protein A2 (S100A2), mRNA
gi|31342775|ref|NM_174132.2|	6.59	1.97	-1.74208	0.000128082	0.000606073	Bos taurus oxidized low density lipoprotein (lectin-like) receptor 1 (OLR1), mRNA
gi|31341694|ref|NM_174552.2|	6.59	1.97	-1.74208	0.000128082	0.000605753	Bos taurus interferon (alpha, beta and omega) receptor 1 (IFNAR1), mRNA
gi|114050778|ref|NM_001046468.1|	76.76	23.06	-1.73496	1.07212e-39	5.49355e-38	Bos taurus protein kinase C and casein kinase substrate in neurons 2 (PACSIN2), mRNA
gi|27806094|ref|NM_174438.1|	35.68	10.73	-1.73347	2.9209e-19	8.10889e-18	Bos taurus protein S (alpha) (PROS1), mRNA
gi|157074157|ref|NM_001103323.1|	79.47	23.96	-1.72978	6.98708e-41	3.70729e-39	Bos taurus lipase A, lysosomal acid, cholesterol esterase (LIPA), mRNA
gi|149642670|ref|NM_001098909.1|	42.61	12.87	-1.72718	1.34879e-22	4.35056e-21	Bos taurus E74-like factor 3 (ets domain transcription factor, epithelial-specific ) (ELF3), mRNA
gi|165377312|ref|NM_001113538.1|	28.24	8.58	-1.71869	2.26222e-15	5.00872e-14	Bos taurus placenta-expressed transcript 1 protein (PLET1), mRNA
gi|116003864|ref|NM_001076823.1|	11.16	3.4	-1.71473	7.3211e-07	5.32427e-06	Bos taurus T-cell activation GTPase activating protein (TAGAP), mRNA
gi|115495518|ref|NM_001075426.1|	24.01	7.33	-1.71175	3.21998e-13	5.53133e-12	Bos taurus angiopoietin-like 1 (ANGPTL1), mRNA
gi|114051136|ref|NM_001046212.1|	29.76	9.12	-1.70627	5.53622e-16	1.28277e-14	Bos taurus C-type lectin domain family 3, member B (CLEC3B), mRNA
gi|148237955|ref|NM_001098058.1|	8.12	2.5	-1.69955	2.94366e-05	0.000159491	Bos taurus transporter 1, ATP-binding cassette, sub-family B (MDR/TAP) (TAP1), mRNA
gi|126723784|ref|NM_001082475.1|	8.12	2.5	-1.69955	2.94366e-05	0.000159395	Bos taurus Lix1 homolog (mouse)-like (LIX1L), mRNA
gi|31340835|ref|NM_174745.2|	44.13	13.59	-1.69921	7.24804e-23	2.34632e-21	Bos taurus matrix metallopeptidase 2 (gelatinase A, 72kDa gelatinase, 72kDa type IV collagenase) (MMP2), mRNA
gi|115496070|ref|NM_001075980.1|	183.79	57.03	-1.68827	3.09884e-89	2.50336e-87	Bos taurus transmembrane 4 L six family member 1 (TM4SF1), mRNA
gi|158341677|ref|NM_001109984.1|	15.56	4.83	-1.68775	6.85616e-09	6.68979e-08	Bos taurus ceroid-lipofuscinosis, neuronal 6, late infantile, variant (CLN6), mRNA
gi|83035084|ref|NM_001037611.1|	7.44	2.32	-1.68118	7.34486e-05	0.000365896	Bos taurus GTPase activating protein (SH3 domain) binding protein 1 (G3BP1), mRNA
gi|114326295|ref|NM_001046043.2|	16.06	5.01	-1.68059	4.25338e-09	4.29505e-08	Bos taurus angiopoietin-like 4 (ANGPTL4), mRNA
gi|118151023|ref|NM_001077964.1|	9.13	2.86	-1.6746	1.108e-05	6.5754e-05	Bos taurus glutaminase (GLS), nuclear gene encoding mitochondrial protein, mRNA
gi|62460617|ref|NM_001014962.1|	9.13	2.86	-1.6746	1.108e-05	6.57106e-05	Bos taurus protein arginine methyltransferase 6 (PRMT6), mRNA
gi|115497991|ref|NM_001076099.1|	45.65	14.3	-1.6746	3.82172e-23	1.2599e-21	Bos taurus ras homolog gene family, member V (RHOV), mRNA
gi|157279906|ref|NM_001104999.1|	105.5	33.08	-1.67321	2.35e-51	1.42381e-49	Bos taurus parathymosin (PTMS), mRNA
gi|31342177|ref|NM_174373.2|	22.15	6.97	-1.66808	6.57126e-12	8.98239e-11	Bos taurus potassium inwardly-rectifying channel, subfamily J, member 2 (KCNJ2), mRNA
gi|31340684|ref|NM_174707.2|	921.48	289.99	-1.66795	0	0	Bos taurus matrix Gla protein (MGP), mRNA
gi|75832133|ref|NM_001025342.2|	88.43	27.89	-1.66479	5.25014e-43	2.90605e-41	Bos taurus ribosomal protein S13 (RPS13), mRNA
gi|115494983|ref|NM_001076301.1|	449.92	142.14	-1.66236	4.48664e-211	4.78949e-209	Bos taurus apolipoprotein D (APOD), mRNA
gi|116004094|ref|NM_001076940.1|	19.78	6.26	-1.65981	1.00025e-10	1.2203e-09	Bos taurus copine I (CPNE1), mRNA
gi|115495300|ref|NM_001075939.1|	13.53	4.29	-1.65711	1.00186e-07	8.23439e-07	Bos taurus docking protein 5 (DOK5), mRNA
gi|84000050|ref|NM_001038038.1|	10.14	3.22	-1.65493	4.1807e-06	2.69119e-05	Bos taurus ATPase, H+ transporting, lysosomal 21kDa, V0 subunit b (ATP6V0B), mRNA
gi|168804013|ref|NM_001114862.1|	12.34	3.93	-1.65074	3.97202e-07	3.01074e-06	Bos taurus defensin, beta 103B (DEFB103B), mRNA
gi|139948660|ref|NM_001083770.1|	14.03	4.47	-1.65017	6.19074e-08	5.27684e-07	Bos taurus hypothetical LOC614962 (MGC151592), mRNA
gi|31341591|ref|NM_174589.2|	30.27	9.65	-1.64929	1.58401e-15	3.53328e-14	Bos taurus prostaglandin E receptor 4 (subtype EP4) (PTGER4), mRNA
gi|78369427|ref|NM_001035317.1|	32.46	10.37	-1.64625	1.59287e-16	3.80888e-15	Bos taurus major vault protein (MVP), mRNA
gi|31342724|ref|NM_174154.2|	51.91	16.63	-1.64222	1.92272e-25	6.8964e-24	Bos taurus palmitoyl-protein thioesterase 1 (PPT1), mRNA
gi|155372174|ref|NM_001101228.1|	88.6	28.43	-1.63989	3.27226e-42	1.76761e-40	Bos taurus chondrolectin (CHODL), mRNA
gi|77735932|ref|NM_001034491.1|	48.86	15.73	-1.63514	6.7706e-24	2.32613e-22	Bos taurus PDZ and LIM domain 4 (PDLIM4), mRNA
gi|139948604|ref|NM_001083695.1|	13.86	4.47	-1.63258	9.32954e-08	7.73894e-07	Bos taurus ferric-chelate reductase 1 (FRRS1), mRNA
gi|157428069|ref|NM_001105473.1|	34.83	11.26	-1.62912	2.24464e-17	5.68579e-16	Bos taurus stomatin (STOM), mRNA
gi|31341417|ref|NM_174657.2|	37.54	12.16	-1.62629	1.41204e-18	3.80234e-17	Bos taurus solute carrier family 25 (mitochondrial carrier; phosphate carrier), member 3 (SLC25A3), nuclear gene encoding mitochondrial protein, mRNA
gi|155371842|ref|NM_001101056.1|	24.18	7.87	-1.61938	2.06594e-12	3.00248e-11	Bos taurus casein kinase 1, gamma 2 (CSNK1G2), mRNA
gi|94966804|ref|NM_001040503.1|	9.81	3.22	-1.60719	9.5295e-06	5.71961e-05	Bos taurus zinc finger protein 575 (ZNF575), mRNA
gi|77736432|ref|NM_001034744.1|	9.81	3.22	-1.60719	9.5295e-06	5.71579e-05	Bos taurus transmembrane protein 37 (TMEM37), mRNA
gi|114051525|ref|NM_001046593.1|	168.23	55.42	-1.60196	4.70218e-76	3.54323e-74	Bos taurus coactosin-like 1 (Dictyostelium) (COTL1), mRNA
gi|297482708|ref|XM_002692994.1|	13.02	4.29	-1.60168	3.41292e-07	2.6157e-06	PREDICTED: Bos taurus ubiquitin specific peptidase 28 (USP28), mRNA
gi|156120588|ref|NM_001101970.1|	13.02	4.29	-1.60168	3.41292e-07	2.61346e-06	Bos taurus testis expressed 2 (TEX2), mRNA
gi|89886135|ref|NM_001013585.3|	19.44	6.44	-1.5939	4.70752e-10	5.33658e-09	Bos taurus sphingosine-1-phosphate receptor 1 (S1PR1), mRNA
gi|164518989|ref|NM_001113311.1|	8.62	2.86	-1.59167	3.83146e-05	0.000202456	Bos taurus CDC28 protein kinase regulatory subunit 1B (CKS1B), mRNA
gi|115496499|ref|NM_001075344.1|	9.13	3.04	-1.58654	2.34024e-05	0.000129297	Bos taurus transmembrane protein 102 (TMEM102), mRNA
gi|115497825|ref|NM_001076112.1|	53.09	17.7	-1.58469	9.1477e-25	3.24219e-23	Bos taurus GLI pathogenesis-related 2 (GLIPR2), mRNA
gi|31343195|ref|NM_173948.2|	88.43	29.5	-1.58382	3.73294e-40	1.93487e-38	Bos taurus peptidylglycine alpha-amidating monooxygenase (PAM), mRNA
gi|31343628|ref|NM_177521.2|	63.24	21.1	-1.58359	3.57734e-29	1.43205e-27	Bos taurus sulfotransferase family, cytosolic, 1A, phenol-preferring, member 1 (SULT1A1), mRNA
gi|31343190|ref|NM_173950.2|	9.64	3.22	-1.58197	1.43099e-05	8.27848e-05	Bos taurus placental growth factor (PGF), mRNA
gi|164448599|ref|NM_001024488.2|	73.21	24.49	-1.57985	2.09862e-33	9.22467e-32	Bos taurus solute carrier family 3 (activators of dibasic and neutral amino acid transport), member 2 (SLC3A2), mRNA
gi|84000574|ref|NM_001015576.2|	17.08	5.72	-1.57822	7.15276e-09	6.94895e-08	Bos taurus chemokine (C-X-C motif) ligand 13 (CXCL13), mRNA
gi|148230339|ref|NM_174557.3|	364.87	122.29	-1.57708	3.5735e-159	3.483e-157	Bos taurus insulin-like growth factor binding protein 4 (IGFBP4), mRNA
gi|156120824|ref|NM_001102089.1|	7.44	2.5	-1.57337	0.000155163	0.000718302	Bos taurus threonyl-tRNA synthetase-like 2 (TARSL2), mRNA
gi|156121124|ref|NM_001102240.1|	7.44	2.5	-1.57337	0.000155163	0.000717931	Bos taurus cysteinyl leukotriene receptor 2 (CYSLTR2), mRNA
gi|194669095|ref|XM_001787830.1|	8.45	2.86	-1.56294	5.7475e-05	0.000290682	PREDICTED: Bos taurus hypothetical LOC100139380 (LOC100139380), mRNA
gi|157427813|ref|NM_001105344.1|	17.42	5.9	-1.56196	6.57138e-09	6.42591e-08	Bos taurus CD8b molecule (CD8B), mRNA
gi|33354270|ref|NM_182788.1|	47.85	16.27	-1.5563	6.25952e-22	1.94218e-20	Bos taurus tissue factor pathway inhibitor 2 (TFPI2), mRNA
gi|157279868|ref|NM_001104980.1|	25.7	8.76	-1.55277	2.06038e-12	2.99926e-11	Bos taurus alveolar soft part sarcoma chromosome region, candidate 1 (ASPSCR1), mRNA
gi|31343626|ref|NM_177519.2|	47.68	16.27	-1.55117	9.23986e-22	2.83746e-20	Bos taurus UDP-N-acetyl-alpha-D-galactosamine:polypeptide N-acetylgalactosaminyltransferase 1 (GalNAc-T1) (GALNT1), mRNA
gi|156120608|ref|NM_001101980.1|	92.15	31.47	-1.55001	1.53489e-40	8.04877e-39	Bos taurus collagen, type XVII, alpha 1 (COL17A1), mRNA
gi|114051885|ref|NM_001046529.1|	10.48	3.58	-1.54961	8.01018e-06	4.85648e-05	Bos taurus V-set and immunoglobulin domain containing 4 (VSIG4), mRNA
gi|77735620|ref|NM_001034334.1|	16.74	5.72	-1.54921	1.57969e-08	1.46182e-07	Bos taurus lymphocyte-specific protein tyrosine kinase (LCK), mRNA
gi|31342993|ref|NM_174034.2|	41.76	14.3	-1.54611	3.6987e-19	1.02365e-17	Bos taurus cytochrome b-245, alpha polypeptide (CYBA), mRNA
gi|125991759|ref|NM_173976.2|	12	4.11	-1.54582	1.84596e-06	1.26068e-05	Bos taurus tubulin polymerization promoting protein (TPPP), mRNA
gi|157954054|ref|NM_001109793.1|	65.6	22.53	-1.54185	4.05042e-29	1.61423e-27	Bos taurus ankylosis, progressive homolog (mouse) (ANKH), mRNA
gi|83035044|ref|NM_001037593.1|	7.78	2.68	-1.53754	0.000141143	0.000659527	Bos taurus glutamate receptor, ionotropic, N-methyl D-aspartate-associated protein 1 (glutamate binding) (GRINA), mRNA
gi|115497081|ref|NM_001075656.1|	22.32	7.69	-1.53728	7.95786e-11	9.77509e-10	Bos taurus jun B proto-oncogene (JUNB), mRNA
gi|156120794|ref|NM_001102074.1|	181.25	62.75	-1.53029	1.20915e-76	9.26703e-75	Bos taurus quiescin Q6 sulfhydryl oxidase 1 (QSOX1), mRNA
gi|77404253|ref|NM_001034038.1|	53.6	18.59	-1.52771	9.19878e-24	3.12445e-22	Bos taurus ribosomal protein S3A (RPS3A), mRNA
gi|95147663|ref|NM_001040472.1|	40.07	13.95	-1.52226	4.48944e-18	1.18752e-16	Bos taurus CD3g molecule, gamma (CD3-TCR complex) (CD3G), mRNA
gi|75812933|ref|NM_001033615.1|	432.33	150.54	-1.52199	8.33422e-179	8.39696e-177	Bos taurus cathepsin S (CTSS), mRNA
gi|297459468|ref|XM_607000.5|	20.97	7.33	-1.51644	4.52038e-10	5.13092e-09	PREDICTED: Bos taurus RAB2B protein, transcript variant 1 (RAB2B), mRNA
gi|114051502|ref|NM_001046162.1|	32.12	11.26	-1.51227	1.21736e-14	2.58675e-13	Bos taurus dehydrogenase/reductase (SDR family) member 7 (DHRS7), mRNA
gi|297473519|ref|XM_002686617.1|	11.67	4.11	-1.50559	4.05298e-06	2.61085e-05	PREDICTED: Bos taurus arginyl aminopeptidase (aminopeptidase B)-like 1 (RNPEPL1), mRNA
gi|148223775|ref|NM_001098147.1|	44.64	15.73	-1.50482	1.22803e-19	3.46281e-18	Bos taurus ras homolog gene family, member U (RHOU), mRNA
gi|114050718|ref|NM_001046600.1|	33.48	11.8	-1.50451	4.2758e-15	9.26113e-14	Bos taurus regulator of G-protein signaling 4 (RGS4), mRNA
gi|157074193|ref|NM_001103341.1|	17.75	6.26	-1.50358	1.19585e-08	1.12995e-07	Bos taurus potassium channel tetramerisation domain containing 5 (KCTD5), mRNA
gi|27807286|ref|NM_174715.1|	127.65	45.23	-1.49684	8.21208e-53	5.18576e-51	Bos taurus ribosomal protein L3 (RPL3), mRNA
gi|262205551|ref|NM_001166617.1|	22.15	7.87	-1.49287	2.3102e-10	2.73292e-09	Bos taurus SLU7 splicing factor homolog (S. cerevisiae) (SLU7), mRNA
gi|157428033|ref|NM_001105455.1|	627.45	223.84	-1.48703	6.37596e-250	7.05842e-248	Bos taurus ribosomal protein L39 (RPL39), mRNA
gi|114052730|ref|NM_001046549.1|	13.02	4.65	-1.48543	1.38043e-06	9.71609e-06	Bos taurus tubulin, beta 2B (TUBB2B), mRNA
gi|297470960|ref|XM_002684851.1|	11.5	4.11	-1.48442	5.97638e-06	3.71638e-05	PREDICTED: Bos taurus Phosphatidylinositol-glycan biosynthesis class X protein-like (LOC100298680), mRNA
gi|155371934|ref|NM_001101102.1|	56.98	20.38	-1.4833	3.63924e-24	1.26977e-22	Bos taurus MyoD family inhibitor domain containing (MDFIC), mRNA
gi|139948228|ref|NM_001083748.1|	10.48	3.75	-1.48268	1.59423e-05	9.12283e-05	Bos taurus twist homolog 2 (Drosophila) (TWIST2), mRNA
gi|75832115|ref|NM_001015590.2|	57.15	20.56	-1.47491	4.81112e-24	1.66569e-22	Bos taurus inter-alpha (globulin) inhibitor H4 (plasma Kallikrein-sensitive glycoprotein) (ITIH4), mRNA
gi|114052944|ref|NM_001046095.1|	105.67	38.08	-1.47246	5.38014e-43	2.95974e-41	Bos taurus chemokine (C-X-C motif) ligand 16 (CXCL16), mRNA
gi|297463419|ref|XM_863881.4|	22.32	8.05	-1.47128	3.06212e-10	3.54297e-09	PREDICTED: Bos taurus bromodomain adjacent to zinc finger domain, 1A, transcript variant 2 (BAZ1A), mRNA
gi|77735870|ref|NM_001034460.1|	11.33	4.11	-1.46294	8.78316e-06	5.30718e-05	Bos taurus zinc finger, AN1-type domain 6 (ZFAND6), mRNA
gi|125630664|ref|NM_001081515.1|	22.66	8.22	-1.46294	2.76612e-10	3.22546e-09	Bos taurus dual-specificity tyrosine-(Y)-phosphorylation regulated kinase 1B (DYRK1B), mRNA
gi|157954419|ref|NM_001109814.1|	28.57	10.37	-1.46209	1.29348e-12	1.92668e-11	Bos taurus angiopoietin-like 2 (ANGPTL2), mRNA
gi|153791309|ref|NM_001099732.1|	38.89	14.12	-1.46166	1.24314e-16	2.98054e-15	Bos taurus Mps one binder kinase activator-like 2 (MOB2), mRNA
gi|297460189|ref|XM_002700881.1|	14.2	5.18	-1.45487	6.89166e-07	5.04058e-06	PREDICTED: Bos taurus hypothetical protein LOC100335259 (LOC100335259), mRNA
gi|155372266|ref|NM_001101276.1|	18.6	6.79	-1.45382	1.2943e-08	1.21401e-07	Bos taurus similar to NKp80 NK receptor (LOC618591), mRNA
gi|115496134|ref|NM_001075985.1|	33.31	12.16	-1.45381	2.3266e-14	4.84052e-13	Bos taurus heme binding protein 1 (HEBP1), mRNA
gi|51591896|ref|NM_001004024.1|	60.02	21.99	-1.4486	1.48981e-24	5.25949e-23	Bos taurus junction plakoglobin (JUP), mRNA
gi|62988307|ref|NM_001017945.1|	20.97	7.69	-1.44727	1.70092e-09	1.79226e-08	Bos taurus deltex homolog 2 (Drosophila) (DTX2), mRNA
gi|115495380|ref|NM_001075416.1|	77.95	28.61	-1.44603	2.45504e-31	1.04333e-29	Bos taurus cathepsin F (CTSF), mRNA
gi|118601753|ref|NM_001079580.1|	11.67	4.29	-1.44376	7.88358e-06	4.79268e-05	Bos taurus triggering receptor expressed on myeloid cells 2 (TREM2), mRNA
gi|76677896|ref|NM_001033936.1|	92.32	33.97	-1.44238	1.12291e-36	5.29956e-35	Bos taurus complement factor H (CFH), mRNA
gi|139948476|ref|NM_001083677.1|	11.16	4.11	-1.44113	1.2864e-05	7.52455e-05	Bos taurus GTPase, IMAP family member 1 (GIMAP1), mRNA
gi|41386720|ref|NM_175781.1|	40.24	14.84	-1.43914	8.24888e-17	2.03208e-15	Bos taurus integrin, beta 2 (complement component 3 receptor 3 and 4 subunit) (ITGB2), mRNA
gi|115496579|ref|NM_001075337.1|	10.65	3.93	-1.43825	2.10096e-05	0.000117306	Bos taurus DnaJ (Hsp40) homolog, subfamily C, member 2 (DNAJC2), mRNA
gi|115497605|ref|NM_001076478.1|	10.65	3.93	-1.43825	2.10096e-05	0.000117233	Bos taurus proteasome (prosome, macropain) inhibitor subunit 1 (PI31) (PSMF1), mRNA
gi|154152088|ref|NM_001100386.1|	21.81	8.05	-1.43793	9.4683e-10	1.03539e-08	Bos taurus yippee-like 1 (Drosophila) (YPEL1), mRNA
gi|297484990|ref|XM_002694666.1|	42.61	15.73	-1.43767	1.11422e-17	2.88764e-16	PREDICTED: Bos taurus immunoglobulin lambda-6a light chain variable region-like (LOC616727), mRNA
gi|297491128|ref|XM_002698619.1|	20.29	7.51	-1.43388	3.99814e-09	4.051e-08	PREDICTED: Bos taurus beta-defensin 2-like (LOC100296173), mRNA
gi|125630722|ref|NM_001081543.1|	16.4	6.08	-1.43155	1.29889e-07	1.05309e-06	Bos taurus potassium voltage-gated channel, Isk-related family, member 4 (KCNE4), mRNA
gi|148229349|ref|NM_001078150.2|	18.26	6.79	-1.4272	2.73922e-08	2.46612e-07	Bos taurus leucine rich repeat containing 17 (LRRC17), mRNA
gi|115495282|ref|NM_001075942.1|	148.79	55.42	-1.4248	4.81504e-57	3.17474e-55	Bos taurus cellular repressor of E1A-stimulated genes 1 (CREG1), mRNA
gi|114052806|ref|NM_001046286.1|	38.38	14.3	-1.42434	7.168e-16	1.65233e-14	Bos taurus hydroxysteroid (17-beta) dehydrogenase 11 (HSD17B11), mRNA
gi|83035094|ref|NM_001037616.1|	8.62	3.22	-1.42063	0.000151095	0.000702006	Bos taurus high-mobility group box 2 (HMGB2), mRNA
gi|31342195|ref|NM_174368.2|	39.23	14.66	-1.42007	4.00774e-16	9.38313e-15	Bos taurus integrin, beta 1 (fibronectin receptor, beta polypeptide, antigen CD29 includes MDF2, MSK12) (ITGB1), mRNA
gi|114050822|ref|NM_001046464.1|	136.28	50.95	-1.41942	4.1967e-52	2.5953e-50	Bos taurus macrophage expressed 1 (MPEG1), mRNA
gi|115496899|ref|NM_001075588.1|	53.09	19.85	-1.4193	2.7333e-21	8.25236e-20	Bos taurus interferon, alpha-inducible protein 6 (IFI6), mRNA
gi|156120398|ref|NM_001101875.1|	832.2	311.98	-1.41548	2e-307	2.32909e-305	Bos taurus thioredoxin interacting protein (TXNIP), mRNA
gi|118151013|ref|NM_001077968.1|	13.36	5.01	-1.41504	2.38006e-06	1.59745e-05	Bos taurus transmembrane protein 185A (TMEM185A), mRNA
gi|115495934|ref|NM_001076239.1|	10.48	3.93	-1.41504	3.06628e-05	0.000165137	Bos taurus glutamate-rich WD repeat containing 1 (GRWD1), mRNA
gi|115495924|ref|NM_001075525.1|	73.89	27.71	-1.41497	7.05402e-29	2.75015e-27	Bos taurus chromosome 12 open reading frame 57 ortholog (C5H12ORF57), mRNA
gi|149642772|ref|NM_001099004.1|	18.09	6.79	-1.41371	3.97164e-08	3.47451e-07	Bos taurus N(alpha)-acetyltransferase 40, NatD catalytic subunit, homolog (S. cerevisiae) (NAA40), mRNA
gi|115496701|ref|NM_001075126.1|	99.76	37.55	-1.40965	3.1925e-38	1.58161e-36	Bos taurus collagen, type VI, alpha 2 (COL6A2), mRNA
gi|110347569|ref|NM_173969.3|	870.92	327.9	-1.40928	0	0	Bos taurus vimentin (VIM), mRNA
gi|116004192|ref|NM_001076982.1|	31.28	11.8	-1.40645	5.54322e-13	9.00472e-12	Bos taurus ATG12 autophagy related 12 homolog (S. cerevisiae) (ATG12), mRNA
gi|122692288|ref|NM_001080214.1|	80.99	30.57	-1.40563	3.34046e-31	1.41292e-29	Bos taurus v-ets erythroblastosis virus E26 oncogene homolog 2 (avian) (ETS2), mRNA
gi|115497439|ref|NM_001076148.1|	11.84	4.47	-1.40532	1.02663e-05	6.12497e-05	Bos taurus oxidation resistance 1 (OXR1), mRNA
gi|84370130|ref|NM_001038549.1|	9.47	3.58	-1.4034	8.20332e-05	0.000404393	Bos taurus kinesin light chain 3 (KLC3), mRNA
gi|115496531|ref|NM_001075342.1|	9.47	3.58	-1.4034	8.20332e-05	0.000404171	Bos taurus DNA fragmentation factor, 45kDa, alpha polypeptide (DFFA), mRNA
gi|31340697|ref|NM_178572.2|	8.96	3.4	-1.39796	0.000134406	0.000631997	Bos taurus carbonic anhydrase II (CA2), mRNA
gi|297468417|ref|XM_002705970.1|	51.23	19.49	-1.39425	4.33442e-20	1.24175e-18	PREDICTED: Bos taurus hypothetical protein LOC100335409 (LOC100335409), mRNA
gi|62460413|ref|NM_001014861.1|	12.68	4.83	-1.39246	5.61618e-06	3.52416e-05	Bos taurus nuclear receptor subfamily 1, group H, member 3 (NR1H3), mRNA
gi|115496847|ref|NM_001076375.1|	10.31	3.93	-1.39144	4.4584e-05	0.000231759	Bos taurus actin filament associated protein 1-like 2 (AFAP1L2), mRNA
gi|115496697|ref|NM_001076047.1|	28.57	10.91	-1.38885	8.60998e-12	1.15405e-10	Bos taurus EFR3 homolog A (S. cerevisiae) (EFR3A), mRNA
gi|31343582|ref|NM_175814.2|	12.17	4.65	-1.38803	9.13978e-06	5.50043e-05	Bos taurus succinate dehydrogenase complex, subunit C, integral membrane protein, 15kDa (SDHC), nuclear gene encoding mitochondrial protein, mRNA
gi|115495284|ref|NM_001075941.1|	17.75	6.79	-1.38634	8.2922e-08	6.94269e-07	Bos taurus ceroid-lipofuscinosis, neuronal 8 (epilepsy, progressive with mental retardation) (CLN8), mRNA
gi|115495836|ref|NM_001076248.1|	23.84	9.12	-1.38628	4.8873e-10	5.50558e-09	Bos taurus plasma glutamate carboxypeptidase (PGCP), mRNA
gi|194687313|ref|XM_001253145.2|	15.89	6.08	-1.38598	3.94958e-07	2.99627e-06	PREDICTED: Bos taurus zinc finger, CCHC domain containing 10-like (LOC784999), partial mRNA
gi|84000252|ref|NM_001038143.1|	11.67	4.47	-1.38446	1.48841e-05	8.5665e-05	Bos taurus glutamate-cysteine ligase, modifier subunit (GCLM), mRNA
gi|297463181|ref|XM_600430.5|	15.39	5.9	-1.38321	6.4009e-07	4.72791e-06	PREDICTED: Bos taurus interleukin 6 signal transducer (gp130, oncostatin M receptor)-like (IL6ST), mRNA
gi|75812937|ref|NM_001033617.1|	232.48	89.39	-1.37892	5.77846e-84	4.58544e-82	Bos taurus cathepsin C (CTSC), mRNA
gi|77735934|ref|NM_001034492.1|	52.75	20.38	-1.37202	3.54708e-20	1.01944e-18	Bos taurus complement component 2 (C2), mRNA
gi|156631000|ref|NM_174459.3|	616.29	238.14	-1.3718	1.05106e-217	1.13552e-215	Bos taurus selenoprotein P, plasma, 1 (SEPP1), mRNA
gi|297464815|ref|XM_001252194.3|	8.79	3.4	-1.37033	0.0001953	0.000883134	PREDICTED: Bos taurus RAB38, member of RAS oncogene family-like, transcript variant 1 (RAB38), mRNA
gi|114052652|ref|NM_001045888.1|	137.97	53.46	-1.36782	5.85372e-50	3.45331e-48	Bos taurus procollagen C-endopeptidase enhancer (PCOLCE), mRNA
gi|118151061|ref|NM_001077983.1|	13.36	5.18	-1.3669	4.434e-06	2.83998e-05	Bos taurus inversin (INVS), mRNA
gi|148233714|ref|NM_001080241.2|	20.29	7.87	-1.36633	1.38717e-08	1.29705e-07	Bos taurus hepsin (HPN), mRNA
gi|297484985|ref|XM_002694642.1|	42.27	16.45	-1.36155	2.70776e-16	6.37283e-15	PREDICTED: Bos taurus immunoglobulin iota chain-like (LOC100336586), partial mRNA
gi|31342524|ref|NM_174241.2|	43.62	16.98	-1.36115	9.39502e-17	2.30178e-15	Bos taurus annexin A8-like 1 (ANXA8L1), mRNA
gi|157785574|ref|NM_001105648.1|	94.51	37.01	-1.35255	3.41002e-34	1.54433e-32	Bos taurus ectonucleoside triphosphate diphosphohydrolase 2 (ENTPD2), mRNA
gi|31343308|ref|NM_173902.2|	4743.83	1857.78	-1.35247	0	0	Bos taurus clusterin (CLU), mRNA
gi|115494951|ref|NM_001075776.1|	44.47	17.52	-1.34383	9.43952e-17	2.30638e-15	Bos taurus osteopetrosis associated transmembrane protein 1 (OSTM1), mRNA
gi|156120870|ref|NM_001102112.1|	9.47	3.75	-1.33647	0.000152127	0.000706067	Bos taurus sal-like 2 (Drosophila) (SALL2), mRNA
gi|125630678|ref|NM_001081526.1|	61.38	24.32	-1.33563	2.3288e-22	7.48471e-21	Bos taurus protein-L-isoaspartate (D-aspartate) O-methyltransferase domain containing 1 (PCMTD1), mRNA
gi|115497487|ref|NM_001076141.1|	57.66	22.88	-1.33348	4.9013e-21	1.46013e-19	Bos taurus catenin (cadherin-associated protein), beta 1, 88kDa (CTNNB1), mRNA
gi|66792913|ref|NM_001024562.1|	45.48	18.06	-1.33243	6.6186e-17	1.63496e-15	Bos taurus epithelial membrane protein 3 (EMP3), mRNA
gi|114051390|ref|NM_001046176.1|	63.4	25.21	-1.33049	6.40304e-23	2.08029e-21	Bos taurus septin 10 (SEPT10), mRNA
gi|114051821|ref|NM_001046526.1|	92.15	36.65	-1.33017	1.43139e-32	6.20063e-31	Bos taurus methionine adenosyltransferase II, beta (MAT2B), mRNA
gi|115496617|ref|NM_001075334.1|	32.8	13.05	-1.32965	1.48434e-12	2.18556e-11	Bos taurus microtubule-associated protein, RP/EB family, member 1 (MAPRE1), mRNA
gi|134085397|ref|NM_174791.3|	779.96	310.55	-1.32857	6.33422e-262	7.09987e-260	Bos taurus prostaglandin D2 synthase 21kDa (brain) (PTGDS), mRNA
gi|156523121|ref|NM_001102505.1|	35	13.95	-1.32709	2.83642e-13	4.9291e-12	Bos taurus v-raf-1 murine leukemia viral oncogene homolog 1 (RAF1), mRNA
gi|122692558|ref|NM_001080272.1|	26.88	10.73	-1.32488	1.69172e-10	2.02803e-09	Bos taurus oncostatin M receptor (OSMR), mRNA
gi|99028962|ref|NM_174129.3|	13.86	5.54	-1.32297	4.97664e-06	3.15598e-05	Bos taurus 5'-nucleotidase, ecto (CD73) (NT5E), mRNA
gi|157427895|ref|NM_001105385.1|	11.16	4.47	-1.31999	4.44116e-05	0.000231131	Bos taurus Kruppel-like factor 4 (gut) (KLF4), mRNA
gi|149642884|ref|NM_001098974.1|	16.06	6.44	-1.31834	9.1624e-07	6.58327e-06	Bos taurus chromosome 10 open reading frame 119 ortholog (C26H10ORF119), mRNA
gi|62526115|ref|NM_001014982.1|	19.61	7.87	-1.31715	5.78638e-08	4.95573e-07	Bos taurus necdin homolog (mouse) (NDN), mRNA
gi|156523173|ref|NM_001102531.1|	20.46	8.22	-1.3156	3.17558e-08	2.81935e-07	Bos taurus RAP2B, member of RAS oncogene family (RAP2B), mRNA
gi|297469247|ref|XM_001256626.3|	55.12	22.35	-1.3023	1.6002e-19	4.48407e-18	PREDICTED: Bos taurus Tryptophanyl-tRNA synthetase, cytoplasmic-like (LOC790042), mRNA
gi|78369209|ref|NM_001035313.1|	17.58	7.15	-1.29792	3.8944e-07	2.96192e-06	Bos taurus transforming growth factor beta 1 induced transcript 1 (TGFB1I1), mRNA
gi|31341294|ref|NM_176646.2|	66.79	27.18	-1.29709	3.39112e-23	1.13042e-21	Bos taurus serpin peptidase inhibitor, clade A (alpha-1 antiproteinase, antitrypsin), member 5 (SERPINA5), mRNA
gi|139948704|ref|NM_001083715.1|	30.27	12.34	-1.29455	2.77958e-11	3.53539e-10	Bos taurus leiomodin 1 (smooth muscle) (LMOD1), mRNA
gi|115495888|ref|NM_001076183.1|	14.03	5.72	-1.29443	6.24628e-06	3.86812e-05	Bos taurus cannabinoid receptor interacting protein 1 (CNRIP1), mRNA
gi|190360732|ref|NM_001128499.1|	57.32	23.42	-1.2913	5.42926e-20	1.55045e-18	Bos taurus TGFB-induced factor homeobox 1 (TGIF1), mRNA
gi|116004150|ref|NM_001076968.1|	68.65	28.07	-1.29023	1.30232e-23	4.40675e-22	Bos taurus mannan-binding lectin serine peptidase 1 (C4/C2 activating component of Ra-reactive factor) (MASP1), mRNA
gi|114051673|ref|NM_001046435.1|	44.13	18.06	-1.28896	1.05982e-15	2.39986e-14	Bos taurus calcium binding and coiled-coil domain 1 (CALCOCO1), mRNA
gi|66792863|ref|NM_001024537.1|	10.48	4.29	-1.28859	0.000103157	0.000497585	Bos taurus glia maturation factor, gamma (GMFG), mRNA
gi|84000128|ref|NM_001038076.1|	36.69	15.02	-1.2885	2.71948e-13	4.78149e-12	Bos taurus chemokine (C-C motif) ligand 21 (CCL21), mRNA
gi|149773571|ref|NM_001098986.1|	13.53	5.54	-1.2882	1.00981e-05	6.04473e-05	Bos taurus non-metastatic cells 3, protein expressed in (NME3), mRNA
gi|31340784|ref|NM_174667.2|	13.53	5.54	-1.2882	1.00981e-05	6.0407e-05	Bos taurus NADH dehydrogenase (ubiquinone) 1 beta subcomplex, 8, 19kDa (NDUFB8), nuclear gene encoding mitochondrial protein, mRNA
gi|28461188|ref|NM_175782.1|	18.77	7.69	-1.28737	1.87585e-07	1.49385e-06	Bos taurus lectin, galactoside-binding, soluble, 1 (LGALS1), mRNA
gi|149642770|ref|NM_001099036.1|	40.41	16.63	-1.28092	2.24102e-14	4.67331e-13	Bos taurus NCK adaptor protein 2 (NCK2), mRNA
gi|139947655|ref|NM_001083689.1|	17.75	7.33	-1.27593	4.8519e-07	3.62861e-06	Bos taurus forkhead box P1 (FOXP1), mRNA
gi|78042581|ref|NM_001034555.2|	35	14.48	-1.27329	1.55771e-12	2.28609e-11	Bos taurus S100 calcium binding protein B (S100B), mRNA
gi|62751653|ref|NM_001015673.1|	11.67	4.83	-1.27271	4.8802e-05	0.00025121	Bos taurus myelin protein zero-like 2 (MPZL2), mRNA
gi|198282112|ref|NM_001105651.1|	264.61	109.6	-1.27162	2.28124e-84	1.82642e-82	Bos taurus MHC class I antigen (BOLA-N), mRNA
gi|93205064|ref|NM_173891.2|	190.21	78.85	-1.27041	4.49016e-61	3.05025e-59	Bos taurus brain ribonuclease (BRB), mRNA
gi|149642596|ref|NM_001098868.1|	21.13	8.76	-1.27029	4.35252e-08	3.78923e-07	Bos taurus BCL2-related ovarian killer (BOK), mRNA
gi|31343307|ref|NM_173900.2|	725.35	300.9	-1.26939	2.81878e-227	3.08244e-225	Bos taurus CD9 molecule (CD9), mRNA
gi|88853807|ref|NM_174146.3|	73.21	30.39	-1.26844	1.83689e-24	6.43414e-23	Bos taurus plasminogen activator, tissue (PLAT), mRNA
gi|262073105|ref|NM_001166521.1|	146.25	60.79	-1.26653	3.82384e-47	2.21215e-45	Bos taurus cathepsin D (CTSD), mRNA
gi|78042515|ref|NM_001035027.1|	58.5	24.32	-1.26629	8.05372e-20	2.29263e-18	Bos taurus phospholipid transfer protein (PLTP), mRNA
gi|110350682|ref|NM_178318.3|	164.17	68.48	-1.26144	2.15158e-52	1.34918e-50	Bos taurus biglycan (BGN), mRNA
gi|149642730|ref|NM_001099083.1|	31.28	13.05	-1.26119	3.3198e-11	4.19277e-10	Bos taurus serpin peptidase inhibitor, clade A (alpha-1 antiproteinase, antitrypsin), member 11 (SERPINA11), mRNA
gi|194678697|ref|XM_001790498.1|	12	5.01	-1.26015	4.27202e-05	0.000223366	PREDICTED: Bos taurus hypothetical LOC100140431 (LOC100140431), mRNA
gi|115496088|ref|NM_001075983.1|	19.27	8.05	-1.2593	2.04532e-07	1.61732e-06	Bos taurus matrix metallopeptidase 19 (MMP19), mRNA
gi|156120570|ref|NM_001101961.1|	40.58	16.98	-1.25693	4.80918e-14	9.56184e-13	Bos taurus receptor accessory protein 3 (REEP3), mRNA
gi|84000404|ref|NM_001038214.1|	24.35	10.19	-1.25677	5.5479e-09	5.46682e-08	Bos taurus src kinase associated phosphoprotein 2 (SKAP2), mRNA
gi|118151273|ref|NM_001078101.1|	63.07	26.46	-1.25314	6.41094e-21	1.89102e-19	Bos taurus zyxin (ZYX), mRNA
gi|164420732|ref|NM_001024543.2|	14.88	6.26	-1.24914	5.96402e-06	3.71127e-05	Bos taurus docking protein 1 (DOK1), mRNA
gi|62460479|ref|NM_001014894.1|	36.52	15.38	-1.24763	1.15125e-12	1.74086e-11	Bos taurus ribosomal protein L4 (RPL4), mRNA
gi|157168346|ref|NM_001103345.1|	19.11	8.05	-1.24727	2.87652e-07	2.22744e-06	Bos taurus butyrophilin-like 9 (BTNL9), mRNA
gi|139948867|ref|NM_001083732.1|	50.89	21.45	-1.2464	4.85744e-17	1.20322e-15	Bos taurus GTP binding protein overexpressed in skeletal muscle (GEM), mRNA
gi|156523181|ref|NM_001102535.1|	10.99	4.65	-1.24089	0.000111858	0.000536091	Bos taurus hairless homolog (mouse) (HR), mRNA
gi|31341650|ref|NM_181035.2|	10.99	4.65	-1.24089	0.000111858	0.000535805	Bos taurus versican (VCAN), mRNA
gi|77736174|ref|NM_001034614.1|	11.84	5.01	-1.24079	6.03618e-05	0.000304766	Bos taurus BCL2/adenovirus E1B 19kDa interacting protein 3-like (BNIP3L), mRNA
gi|154152126|ref|NM_001100354.1|	11.84	5.01	-1.24079	6.03618e-05	0.000304594	Bos taurus olfactomedin-like 2B (OLFML2B), mRNA
gi|45429974|ref|NM_205779.1|	41.76	17.7	-1.23837	4.01158e-14	8.08356e-13	Bos taurus transmembrane protein 176A (TMEM176A), mRNA
gi|118151441|ref|NM_001078159.1|	99.08	42.02	-1.23752	2.19648e-31	9.37897e-30	Bos taurus lysozyme (LYZ), mRNA
gi|75832101|ref|NM_001014844.2|	57.99	24.67	-1.23305	6.46178e-19	1.76118e-17	Bos taurus actin related protein 2/3 complex, subunit 1B, 41kDa (ARPC1B), mRNA
gi|157427945|ref|NM_001105410.1|	22.66	9.65	-1.23155	3.17318e-08	2.82001e-07	Bos taurus apoptotic chromatin condensation inducer 1 (ACIN1), mRNA
gi|156121022|ref|NM_001102188.1|	25.19	10.73	-1.2312	5.24424e-09	5.19041e-08	Bos taurus sarcoglycan, beta (43kDa dystrophin-associated glycoprotein) (SGCB), mRNA
gi|116004242|ref|NM_001077012.1|	25.19	10.73	-1.2312	5.24424e-09	5.18469e-08	Bos taurus interferon-related developmental regulator 2 (IFRD2), mRNA
gi|148234888|ref|NM_001098108.1|	68.98	29.5	-1.22546	5.1417e-22	1.60647e-20	Bos taurus synaptotagmin IV (SYT4), mRNA
gi|164420782|ref|NM_001035433.2|	15.05	6.44	-1.22463	7.3264e-06	4.49356e-05	Bos taurus ribose 5-phosphate isomerase A (RPIA), mRNA
gi|115749609|ref|NM_001001151.2|	13.36	5.72	-1.22383	2.48638e-05	0.00013628	Bos taurus ST6 (alpha-N-acetyl-neuraminyl-2,3-beta-galactosyl-1,3)-N-acetylgalactosaminide alpha-2,6-sialyltransferase 6 (ST6GALNAC6), mRNA
gi|77735824|ref|NM_001034435.1|	166.54	71.34	-1.22309	1.07103e-50	6.40259e-49	Bos taurus cathepsin K (CTSK), mRNA
gi|297472946|ref|XM_002686227.1|	17.92	7.69	-1.22052	1.03459e-06	7.40394e-06	PREDICTED: Bos taurus formin binding protein 1-like (FNBP1L), mRNA
gi|114052766|ref|NM_001046293.1|	17.08	7.33	-1.22042	1.89649e-06	1.29322e-05	Bos taurus Paf1, RNA polymerase II associated factor, homolog (S. cerevisiae) (PAF1), mRNA
gi|94966784|ref|NM_001040490.1|	11.67	5.01	-1.21992	8.4979e-05	0.000416625	Bos taurus tumor necrosis factor receptor superfamily, member 1B (TNFRSF1B), mRNA
gi|149642926|ref|NM_001098994.1|	10.82	4.65	-1.2184	0.000157615	0.000727398	Bos taurus differentially expressed in FDCP 6 homolog (mouse) (DEF6), mRNA
gi|31342538|ref|NM_174230.2|	29.93	12.87	-1.21758	2.82104e-10	3.28097e-09	Bos taurus adenylate cyclase 7 (ADCY7), mRNA
gi|75832119|ref|NM_001024554.2|	39.9	17.16	-1.21734	3.11262e-13	5.35717e-12	Bos taurus TNFAIP3 interacting protein 1 (TNIP1), mRNA
gi|114052341|ref|NM_001045915.1|	45.65	19.67	-1.21462	6.82196e-15	1.45649e-13	Bos taurus vesicle-associated membrane protein 3 (cellubrevin) (VAMP3), mRNA
gi|50872150|ref|NM_001002891.1|	69.66	30.04	-1.21345	6.68918e-22	2.06834e-20	Bos taurus COX5A protein (COX5A), mRNA
gi|156121316|ref|NM_001102336.1|	15.72	6.79	-1.21112	5.57794e-06	3.50262e-05	Bos taurus hypothetical protein LOC785165 (MGC157332), mRNA
gi|27807038|ref|NM_174575.1|	19.44	8.4	-1.21057	4.3113e-07	3.2569e-06	Bos taurus phosphoinositide-3-kinase, regulatory subunit 1 (alpha) (PIK3R1), mRNA
gi|205277475|ref|NM_001075403.2|	52.08	22.53	-1.20888	1.15642e-16	2.8026e-15	Bos taurus colony stimulating factor 1 receptor (CSF1R), mRNA
gi|155372308|ref|NM_001101297.1|	52.08	22.53	-1.20888	1.15642e-16	2.79505e-15	Bos taurus secretoglobin, family 2A, member 2 (SCGB2A2), mRNA
gi|163915358|ref|NM_001113174.1|	143.21	62.04	-1.20686	5.92786e-43	3.24117e-41	Bos taurus chemokine (C-X-C motif) ligand 12 (CXCL12), mRNA
gi|156523179|ref|NM_001102534.1|	17.75	7.69	-1.20676	1.44501e-06	1.00836e-05	Bos taurus prickle homolog 1 (Drosophila) (PRICKLE1), mRNA
gi|115497545|ref|NM_001075574.1|	19.78	8.58	-1.20499	3.76368e-07	2.86737e-06	Bos taurus ubiquitin-like modifier activating enzyme 3 (UBA3), mRNA
gi|149642790|ref|NM_001099119.1|	29.25	12.69	-1.20474	6.23274e-10	6.91695e-09	Bos taurus CHMP family, member 7 (CHMP7), mRNA
gi|110347601|ref|NM_001040481.2|	55.63	24.14	-1.20444	1.32173e-17	3.40574e-16	Bos taurus major histocompatibility complex, class II, DM beta-chain, expressed (HLA-DMB), mRNA
gi|31340754|ref|NM_174679.2|	95.36	41.48	-1.20097	6.05836e-29	2.37228e-27	Bos taurus integrin, beta 5 (ITGB5), mRNA
gi|157954048|ref|NM_001109791.1|	17.25	7.51	-1.19971	2.30996e-06	1.55623e-05	Bos taurus absent in melanoma 1-like (AIM1L), mRNA
gi|77736204|ref|NM_001034629.1|	112.94	49.17	-1.19971	6.23472e-34	2.80938e-32	Bos taurus epoxide hydrolase 1, microsomal (xenobiotic) (EPHX1), mRNA
gi|157279974|ref|NM_001105033.1|	11.5	5.01	-1.19875	0.000119191	0.0005679	Bos taurus hypothetical protein LOC100125414 (LOC100125414), mRNA
gi|155372244|ref|NM_001101265.1|	13.53	5.9	-1.19737	3.03176e-05	0.000163671	Bos taurus shisa homolog 2 (Xenopus laevis) (SHISA2), mRNA
gi|149642974|ref|NM_001098917.1|	27.05	11.8	-1.19684	3.27014e-09	3.35507e-08	Bos taurus ubiquitin-conjugating enzyme E2L 6 (UBE2L6), mRNA
gi|297463808|ref|XM_870004.4|	66.28	28.96	-1.19451	1.98426e-20	5.73963e-19	PREDICTED: Bos taurus similar to complement component 4A (LOC617696), mRNA
gi|77736352|ref|NM_001034704.1|	94.85	41.48	-1.19323	1.59375e-28	6.15998e-27	Bos taurus dimethylarginine dimethylaminohydrolase 2 (DDAH2), mRNA
gi|62751724|ref|NM_001015658.1|	18.77	8.22	-1.19122	9.57828e-07	6.87107e-06	Bos taurus vacuolar protein sorting 72 homolog (S. cerevisiae) (VPS72), mRNA
gi|118151053|ref|NM_001077976.1|	22.83	10.01	-1.18949	6.54244e-08	5.5555e-07	Bos taurus V-set and transmembrane domain containing 2 like (VSTM2L), mRNA
gi|156523227|ref|NM_001102558.1|	178.55	78.31	-1.18906	6.21662e-52	3.81811e-50	Bos taurus chemokine (C-X3-C motif) receptor 1 (CX3CR1), mRNA
gi|94966842|ref|NM_001040523.1|	13.86	6.08	-1.18878	2.637e-05	0.00014392	Bos taurus glutaredoxin 2 (GLRX2), mRNA
gi|114053012|ref|NM_001046239.1|	10.99	4.83	-1.1861	0.000191991	0.000870804	Bos taurus CD36 antigen like (MGC137452), mRNA
gi|148232265|ref|NM_001098029.1|	216.08	95.29	-1.18117	7.7097e-62	5.27732e-60	Bos taurus fibulin 1 (FBLN1), mRNA
gi|115496403|ref|NM_001076334.1|	13.36	5.9	-1.17913	4.22622e-05	0.000221358	Bos taurus small nuclear ribonucleoprotein polypeptide C (SNRPC), mRNA
gi|88853815|ref|NM_201527.2|	406.8	179.68	-1.17889	1.8744e-114	1.66413e-112	Bos taurus superoxide dismutase 2, mitochondrial (SOD2), nuclear gene encoding mitochondrial protein, mRNA
gi|62751594|ref|NM_001015593.1|	12.51	5.54	-1.17512	7.8043e-05	0.000386423	Bos taurus eukaryotic translation initiation factor 2B, subunit 2 beta, 39kDa (EIF2B2), mRNA
gi|31340720|ref|NM_174692.2|	19.78	8.76	-1.17504	6.3275e-07	4.68141e-06	Bos taurus family with sequence similarity 13, member A1 (FAM13A1), mRNA
gi|148747465|ref|NM_174031.2|	671.92	297.68	-1.17453	1.14652e-186	1.1817e-184	Bos taurus cathepsin B (CTSB), mRNA
gi|164448627|ref|NM_001015642.2|	53.6	23.78	-1.17248	2.27524e-16	5.38313e-15	Bos taurus carboxypeptidase X (M14 family), member 1 (CPXM1), mRNA
gi|83716001|ref|NM_001037816.1|	13.7	6.08	-1.17203	3.66972e-05	0.000194253	Bos taurus thymidylate synthetase (TYMS), mRNA
gi|75812921|ref|NM_001033609.1|	11.67	5.18	-1.17178	0.000144399	0.000673338	Bos taurus chaperonin containing TCP1, subunit 8 (theta) (CCT8), mRNA
gi|77736168|ref|NM_001034611.1|	14.88	6.62	-1.16847	1.73062e-05	9.82803e-05	Bos taurus PDZ domain containing 1 (PDZK1), mRNA
gi|116004072|ref|NM_001076925.1|	12.85	5.72	-1.16768	6.77062e-05	0.000338607	Bos taurus sperm associated antigen 9 (SPAG9), mRNA
gi|114052339|ref|NM_001045866.1|	16.06	7.15	-1.16746	8.18206e-06	4.95733e-05	Bos taurus bromodomain containing 2 (BRD2), mRNA
gi|148540185|ref|NM_173946.2|	207.12	92.43	-1.16403	5.0162e-58	3.33187e-56	Bos taurus osteoglycin (OGN), mRNA
gi|114051807|ref|NM_001045966.1|	38.04	16.98	-1.16368	6.57648e-12	8.97584e-11	Bos taurus complement component 7 (C7), mRNA
gi|77736306|ref|NM_001034681.1|	24.35	10.91	-1.15827	4.53768e-08	3.93514e-07	Bos taurus rhotekin (RTKN), mRNA
gi|31342582|ref|NM_174211.2|	43.45	19.49	-1.15662	2.7111e-13	4.77612e-12	Bos taurus UDP-glucose 6-dehydrogenase (UGDH), mRNA
gi|31341861|ref|NM_174487.2|	19.11	8.58	-1.15528	1.39015e-06	9.73865e-06	Bos taurus vascular endothelial growth factor B (VEGFB), mRNA
gi|60302690|ref|NM_174315.3|	77.1	34.68	-1.15263	2.65862e-22	8.51423e-21	Bos taurus fatty acid binding protein 5 (psoriasis-associated) (FABP5), mRNA
gi|114052650|ref|NM_001046309.1|	11.5	5.18	-1.15061	0.000200594	0.000902522	Bos taurus BMP and activin membrane-bound inhibitor homolog (Xenopus laevis) (BAMBI), mRNA
gi|114051128|ref|NM_001046020.1|	29.76	13.41	-1.15007	1.81271e-09	1.90112e-08	Bos taurus retinoic acid receptor responder (tazarotene induced) 2 (RARRES2), mRNA
gi|71037404|ref|NM_001025569.1|	305.69	137.85	-1.14897	4.36244e-83	3.40157e-81	Bos taurus heat shock 27kDa protein 1 (HSPB1), mRNA
gi|78045237|ref|NM_001034502.1|	185.14	83.49	-1.14894	5.12436e-51	3.0839e-49	Bos taurus actin, alpha 2, smooth muscle, aorta (ACTA2), mRNA
gi|77735464|ref|NM_001034255.1|	71.35	32.18	-1.14875	1.17782e-20	3.44022e-19	Bos taurus complement factor D (adipsin) (CFD), mRNA
gi|31342841|ref|NM_174101.2|	77.61	35.04	-1.14724	2.76854e-22	8.80337e-21	Bos taurus legumain (LGMN), mRNA
gi|156120940|ref|NM_001102147.1|	18.6	8.4	-1.14684	2.2068e-06	1.49009e-05	Bos taurus FGFR1 oncogene partner 2 (FGFR1OP2), mRNA
gi|118150957|ref|NM_001077928.1|	21.3	9.65	-1.14225	4.33774e-07	3.27136e-06	Bos taurus plexin domain containing 2 (PLXDC2), mRNA
gi|114052299|ref|NM_001045917.1|	13.02	5.9	-1.14194	8.12966e-05	0.000401203	Bos taurus drebrin 1 (DBN1), mRNA
gi|125630726|ref|NM_001081546.1|	20.12	9.12	-1.14152	9.1087e-07	6.54994e-06	Bos taurus hematological and neurological expressed 1-like (HN1L), mRNA
gi|147904941|ref|NM_001011678.2|	151.33	68.65	-1.14037	1.57815e-41	8.47379e-40	Bos taurus nuclear factor (erythroid-derived 2)-like 2 (NFE2L2), mRNA
gi|115494975|ref|NM_001075397.1|	44.13	20.02	-1.14032	3.3682e-13	5.73105e-12	Bos taurus c-src tyrosine kinase (CSK), mRNA
gi|114052379|ref|NM_001046538.1|	48.69	22.17	-1.13502	2.5083e-14	5.20646e-13	Bos taurus RAB15, member RAS onocogene family (RAB15), mRNA
gi|87196493|ref|NM_174024.2|	28.24	12.87	-1.13373	7.1083e-09	6.91325e-08	Bos taurus cytochrome c oxidase subunit 8A (ubiquitous) (COX8A), mRNA
gi|156523109|ref|NM_001102499.1|	73.72	33.61	-1.13317	7.33302e-21	2.14886e-19	Bos taurus scavenger receptor class A, member 5 (putative) (SCARA5), mRNA
gi|114052904|ref|NM_001046092.1|	275.26	125.51	-1.13299	2.27432e-73	1.67163e-71	Bos taurus septin 2 (SEPT2), mRNA
gi|116004454|ref|NM_001077119.1|	12.51	5.72	-1.12899	0.00012976	0.000612401	Bos taurus dynein, light chain, roadblock-type 2 (DYNLRB2), mRNA
gi|134085875|ref|NM_001083412.1|	27.73	12.69	-1.12776	1.11969e-08	1.06246e-07	Bos taurus serine incorporator 3 (SERINC3), mRNA
gi|115497323|ref|NM_001075265.1|	39.06	17.88	-1.12735	1.1612e-11	1.54031e-10	Bos taurus pre-B-cell leukemia homeobox interacting protein 1 (PBXIP1), mRNA
gi|118151299|ref|NM_001078116.1|	127.99	58.64	-1.12607	1.02878e-34	4.75521e-33	Bos taurus abhydrolase domain containing 12 (ABHD12), mRNA
gi|297459260|ref|XM_001256127.3|	24.18	11.08	-1.12586	1.02154e-07	8.38842e-07	PREDICTED: Bos taurus RAB11 family interacting protein 3 (class II) (RAB11FIP3), mRNA
gi|189491886|ref|NM_001128197.1|	48.36	22.17	-1.12521	4.67068e-14	9.32784e-13	Bos taurus profilin 2 (PFN2), mRNA
gi|83715991|ref|NM_001037815.1|	48.36	22.17	-1.12521	4.67068e-14	9.30711e-13	Bos taurus coatomer protein complex, subunit gamma (COPG), mRNA
gi|77735632|ref|NM_001034340.1|	33.14	15.2	-1.1245	4.48992e-10	5.1028e-09	Bos taurus cysteine-rich, angiogenic inducer, 61 (CYR61), mRNA
gi|31341917|ref|NM_174465.2|	60.7	27.89	-1.12195	3.39818e-17	8.51159e-16	Bos taurus SEC11 homolog A (S. cerevisiae) (SEC11A), mRNA
gi|122692410|ref|NM_001080329.1|	17.08	7.87	-1.11787	8.79358e-06	5.3099e-05	Bos taurus phosphatidic acid phosphatase type 2A (PPAP2A), mRNA
gi|116003962|ref|NM_001076873.1|	22.49	10.37	-1.11687	3.37354e-07	2.58994e-06	Bos taurus bromodomain containing 3 (BRD3), mRNA
gi|77735578|ref|NM_001034313.1|	116.66	53.99	-1.11155	3.65296e-31	1.53784e-29	Bos taurus fibrinogen-like 1 (FGL1), mRNA
gi|31343104|ref|NM_173986.2|	21.98	10.19	-1.10904	5.31678e-07	3.95648e-06	Bos taurus v-akt murine thymoma viral oncogene homolog 1 (AKT1), mRNA
gi|154152010|ref|NM_001100299.1|	42.78	19.85	-1.1078	2.48874e-12	3.57637e-11	Bos taurus cysteine-rich secretory protein LCCL domain containing 2 (CRISPLD2), mRNA
gi|84000266|ref|NM_001038147.1|	18.09	8.4	-1.10673	5.70566e-06	3.57032e-05	Bos taurus coiled-coil domain containing 50 (CCDC50), mRNA
gi|156121304|ref|NM_001102330.1|	15.39	7.15	-1.10598	2.9464e-05	0.000159447	Bos taurus DCP1 decapping enzyme homolog A (S. cerevisiae) (DCP1A), mRNA
gi|115497653|ref|NM_001075240.1|	19.61	9.12	-1.10448	2.34554e-06	1.57546e-05	Bos taurus nuclear factor, interleukin 3 regulated (NFIL3), mRNA
gi|115495826|ref|NM_001076250.1|	12.68	5.9	-1.10377	0.00015422	0.000714302	Bos taurus CREB regulated transcription coactivator 2 (CRTC2), mRNA
gi|31342980|ref|NM_174037.2|	82.17	38.26	-1.10277	3.68672e-22	1.15996e-20	Bos taurus delta-like 1 homolog (Drosophila) (DLK1), mRNA
gi|155371852|ref|NM_001101061.1|	68.65	32	-1.10119	1.01559e-18	2.7513e-17	Bos taurus ADAMTS-like 4 (ADAMTSL4), mRNA
gi|116734830|ref|NM_001075179.1|	14.2	6.62	-1.10099	6.25278e-05	0.000314463	Bos taurus mannose-P-dolichol utilization defect 1 (MPDU1), mRNA
gi|195539516|ref|NM_001130756.1|	41.76	19.49	-1.09939	6.0828e-12	8.3529e-11	Bos taurus retinoic acid receptor, gamma (RARG), mRNA
gi|115497787|ref|NM_001075912.1|	65.1	30.39	-1.09906	8.8919e-18	2.3246e-16	Bos taurus stratifin (SFN), mRNA
gi|164452932|ref|NM_001035421.2|	13.02	6.08	-1.09859	0.0001331	0.000627171	Bos taurus potassium channel tetramerisation domain containing 11 (KCTD11), mRNA
gi|118150945|ref|NM_001077922.1|	110.24	51.49	-1.09828	5.2904e-29	2.09907e-27	Bos taurus ras homolog gene family, member B (RHOB), mRNA
gi|67972412|ref|NM_001024929.1|	30.6	14.3	-1.09752	4.26892e-09	4.30589e-08	Bos taurus basic helix-loop-helix family, member e40 (BHLHE40), mRNA
gi|110626168|ref|NM_176641.1|	175	81.88	-1.09577	6.76422e-45	3.86336e-43	Bos taurus sequestosome 1 (SQSTM1), mRNA
gi|114050938|ref|NM_001046444.1|	28.24	13.23	-1.09393	1.85338e-08	1.70454e-07	Bos taurus CDC42 effector protein (Rho GTPase binding) 3 (CDC42EP3), mRNA
gi|156121148|ref|NM_001102252.1|	24.01	11.26	-1.09243	2.24884e-07	1.76271e-06	Bos taurus PTK2B protein tyrosine kinase 2 beta (PTK2B), mRNA
gi|115496581|ref|NM_001076350.1|	28.57	13.41	-1.09119	1.60662e-08	1.48216e-07	Bos taurus membrane protein FAM174B (FAM174B), mRNA
gi|297487421|ref|XM_002696174.1|	42.61	20.02	-1.08975	5.39532e-12	7.45452e-11	PREDICTED: Bos taurus WW domain binding protein 2-like (WBP2), mRNA
gi|156121286|ref|NM_001102321.1|	18.26	8.58	-1.08964	6.73658e-06	4.15168e-05	Bos taurus unc-51-like kinase 2 (C. elegans) (ULK2), mRNA
gi|158819080|ref|NM_001110191.1|	88.26	41.48	-1.08934	2.97932e-23	9.96849e-22	Bos taurus CD302 molecule (CD302), mRNA
gi|41386777|ref|NM_174115.1|	46.67	21.99	-1.08565	6.2077e-13	9.92236e-12	Bos taurus mucin 1, cell surface associated (MUC1), mRNA
gi|66792921|ref|NM_001024566.1|	31.11	14.66	-1.08549	4.3554e-09	4.38326e-08	Bos taurus secretory carrier membrane protein 4 (SCAMP4), mRNA
gi|83035066|ref|NM_001037605.1|	40.58	19.13	-1.08493	2.00844e-11	2.6101e-10	Bos taurus mitochondrial ribosomal protein S33 (MRPS33), nuclear gene encoding mitochondrial protein, mRNA
gi|223636311|ref|NM_001145232.1|	12.51	5.9	-1.08429	0.000211266	0.000947685	Bos taurus transducin (beta)-like 1X-linked (TBL1X), mRNA
gi|115496543|ref|NM_001076011.1|	12.51	5.9	-1.08429	0.000211266	0.000947211	Bos taurus inositol 1,4,5-trisphosphate 3-kinase C (ITPKC), mRNA
gi|121583852|ref|NM_001015635.2|	17.42	8.22	-1.08353	1.22788e-05	7.23892e-05	Bos taurus RAS-like, family 11, member B (RASL11B), mRNA
gi|139948285|ref|NM_001083699.1|	23.84	11.26	-1.08218	3.05452e-07	2.35308e-06	Bos taurus perilipin 1 (PLIN1), mRNA
gi|77736426|ref|NM_001034741.1|	119.2	56.32	-1.08166	1.64248e-30	6.756e-29	Bos taurus leptin receptor overlapping transcript (LEPROT), mRNA
gi|157428085|ref|NM_001105481.1|	40.41	19.13	-1.07888	2.71574e-11	3.4591e-10	Bos taurus RAB8A, member RAS oncogene family (RAB8A), mRNA
gi|116004050|ref|NM_001076919.1|	27.56	13.05	-1.07853	3.93568e-08	3.44641e-07	Bos taurus KIAA1949 (KIAA1949), mRNA
gi|157427963|ref|NM_001105419.1|	21.13	10.01	-1.07785	1.54943e-06	1.07537e-05	Bos taurus zinc finger protein 521 (ZNF521), mRNA
gi|124249235|ref|NM_001080923.1|	203.4	96.37	-1.07766	1.40265e-50	8.32954e-49	Bos taurus hypothetical protein LOC790858 (LOC790858), mRNA
gi|77735436|ref|NM_001034241.1|	19.61	9.3	-1.07629	3.76348e-06	2.43838e-05	Bos taurus UTP14, U3 small nucleolar ribonucleoprotein, homolog A (yeast) (UTP14A), mRNA
gi|157280010|ref|NM_001105051.1|	59.18	28.07	-1.07608	8.33092e-16	1.9057e-14	Bos taurus ring finger protein 1 (RING1), mRNA
gi|157427953|ref|NM_001105414.1|	13.19	6.26	-1.07521	0.000156938	0.000725019	Bos taurus FYN binding protein (FYB), mRNA
gi|31342252|ref|NM_174347.2|	13.19	6.26	-1.07521	0.000156938	0.000724645	Bos taurus hyaluronoglucosaminidase 2 (HYAL2), mRNA
gi|31342663|ref|NM_174177.2|	46.33	21.99	-1.0751	1.13267e-12	1.71856e-11	Bos taurus scinderin (SCIN), mRNA
gi|136256478|ref|NM_001077899.2|	41.42	19.67	-1.07433	1.77139e-11	2.31884e-10	Bos taurus nuclear factor (erythroid-derived 2)-like 3 (NFE2L3), mRNA
gi|297462451|ref|XM_002702145.1|	31.62	15.02	-1.07395	4.42712e-09	4.44049e-08	PREDICTED: Bos taurus hypothetical protein LOC100335170 (LOC100335170), mRNA
gi|155371826|ref|NM_001101048.1|	136.62	64.9	-1.07388	2.44716e-34	1.11958e-32	Bos taurus frizzled homolog 1 (Drosophila) (FZD1), mRNA
gi|157427931|ref|NM_001105403.1|	15.05	7.15	-1.07375	5.49126e-05	0.000278823	Bos taurus intraflagellar transport 57 homolog (Chlamydomonas) (IFT57), mRNA
gi|94966947|ref|NM_001040578.1|	16.91	8.05	-1.07082	1.9333e-05	0.000108826	Bos taurus ribosomal protein S27-like (RPS27L), mRNA
gi|77736512|ref|NM_001034783.1|	649.26	309.48	-1.06895	2.37734e-155	2.29222e-153	Bos taurus ribosomal protein L32 (RPL32), mRNA
gi|78042543|ref|NM_001035043.1|	58.84	28.07	-1.06777	1.51181e-15	3.38909e-14	Bos taurus galactosidase, beta 1 (GLB1), mRNA
gi|297476827|ref|XM_002688938.1|	40.07	19.13	-1.06669	4.9468e-11	6.17799e-10	PREDICTED: Bos taurus high mobility group 20 B-like (LOC100336995), mRNA
gi|77736020|ref|NM_001034537.1|	13.86	6.62	-1.06602	0.000116568	0.000556583	Bos taurus galactose-3-O-sulfotransferase 4 (GAL3ST4), mRNA
gi|77735376|ref|NM_001034209.1|	24.69	11.8	-1.06514	2.6799e-07	2.08058e-06	Bos taurus splA/ryanodine receptor domain and SOCS box containing 1 (SPSB1), mRNA
gi|78369652|ref|NM_001035494.1|	19.44	9.3	-1.06373	5.10442e-06	3.23016e-05	Bos taurus rabphilin 3A-like (without C2 domains) (RPH3AL), mRNA
gi|75832081|ref|NM_176648.3|	48.86	23.42	-1.06091	4.88176e-13	8.06165e-12	Bos taurus capping protein (actin filament) muscle Z-line, beta (CAPZB), mRNA
gi|115496363|ref|NM_001075997.1|	45.82	21.99	-1.05913	2.76892e-12	3.95995e-11	Bos taurus NudC domain containing 3 (NUDCD3), mRNA
gi|297460827|ref|XR_082919.1|	13.02	6.26	-1.05649	0.000213672	0.000955609	PREDICTED: Bos taurus CG7275-like (LOC100138632), miscRNA
gi|94966981|ref|NM_001040593.1|	17.08	8.22	-1.0551	2.2624e-05	0.00012546	Bos taurus B9 protein domain 2 (B9D2), mRNA
gi|42733603|ref|NM_203363.1|	73.04	35.22	-1.05229	1.57976e-18	4.24124e-17	Bos taurus proteolipid protein 2 (colonic epithelium-enriched) (PLP2), mRNA
gi|115496659|ref|NM_001075329.1|	17.42	8.4	-1.05228	1.9515e-05	0.000109712	Bos taurus transcription elongation factor A (SII), 2 (TCEA2), mRNA
gi|115495052|ref|NM_001075144.1|	27.05	13.05	-1.05158	9.69928e-08	8.0086e-07	Bos taurus alanyl (membrane) aminopeptidase (ANPEP), mRNA
gi|134085854|ref|NM_001083435.1|	35.17	16.98	-1.05051	1.22548e-09	1.31446e-08	Bos taurus bridging integrator 2 (BIN2), mRNA
gi|147902867|ref|NM_001098050.1|	21.47	10.37	-1.04991	2.11934e-06	1.43536e-05	Bos taurus mastermind-like 2 (Drosophila) (MAML2), mRNA
gi|115495998|ref|NM_001076232.1|	21.47	10.37	-1.04991	2.11934e-06	1.43427e-05	Bos taurus membrane-associated ring finger (C3HC4) 8 (MARCH8), mRNA
gi|75812927|ref|NM_001033616.1|	74.39	35.94	-1.04952	8.94234e-19	2.42988e-17	Bos taurus GABA(A) receptor-associated protein like 1 (GABARAPL1), mRNA
gi|94966908|ref|NM_001040554.1|	443.15	214.19	-1.0489	1.78079e-103	1.56552e-101	Bos taurus major histocompatibility complex, class I, A (HLA-A), mRNA
gi|115496327|ref|NM_001075359.1|	53.26	25.75	-1.04848	7.61694e-14	1.46569e-12	Bos taurus actin related protein 2/3 complex, subunit 1A, 41kDa (ARPC1A), mRNA
gi|148227161|ref|NM_001097563.1|	69.49	33.61	-1.04791	1.36894e-17	3.50723e-16	Bos taurus arginyl aminopeptidase (aminopeptidase B) (RNPEP), mRNA
gi|88319948|ref|NM_001014391.2|	95.36	46.13	-1.04768	1.46332e-23	4.93294e-22	Bos taurus claudin 4 (CLDN4), mRNA
gi|125630702|ref|NM_001081533.1|	14.03	6.79	-1.04703	0.000136333	0.000640052	Bos taurus zinc finger protein 750 (ZNF750), mRNA
gi|78042471|ref|NM_001034774.1|	56.13	27.18	-1.04623	1.80926e-14	3.79945e-13	Bos taurus tubulin polymerization-promoting protein family member 3 (TPPP3), mRNA
gi|156120882|ref|NM_001102118.1|	22.15	10.73	-1.04566	1.58086e-06	1.09464e-05	Bos taurus DEAD (Asp-Glu-Ala-Asp) box polypeptide 20 (DDX20), mRNA
gi|31341580|ref|NM_174594.2|	71.86	34.86	-1.04362	5.04596e-18	1.3269e-16	Bos taurus ribonuclease, RNase A family, k6 (RNASE6), mRNA
gi|118151421|ref|NM_001078154.1|	35.68	17.34	-1.04101	1.23268e-09	1.32061e-08	Bos taurus SWI/SNF related, matrix associated, actin dependent regulator of chromatin, subfamily d, member 3 (SMARCD3), mRNA
gi|262073015|ref|NM_177505.3|	16.91	8.22	-1.04067	3.05806e-05	0.000164793	Bos taurus phenylethanolamine N-methyltransferase (PNMT), mRNA
gi|116004256|ref|NM_001077019.1|	48.53	23.6	-1.04009	1.37229e-12	2.02724e-11	Bos taurus opioid growth factor receptor (OGFR), mRNA
gi|156120534|ref|NM_001101943.1|	44.81	21.81	-1.03883	1.03679e-11	1.37936e-10	Bos taurus soc-2 suppressor of clear homolog (C. elegans) (SHOC2), mRNA
gi|157074011|ref|NM_001103245.1|	114.97	55.96	-1.03879	1.0379e-27	3.92693e-26	Bos taurus EF-hand domain family, member D2 (EFHD2), mRNA
gi|155372074|ref|NM_001101174.1|	30.43	14.84	-1.036	2.26654e-08	2.06755e-07	Bos taurus sestrin 1 (SESN1), mRNA
gi|94966768|ref|NM_001040476.1|	19.78	9.65	-1.03544	6.93496e-06	4.26514e-05	Bos taurus translocation associated membrane protein 1 (TRAM1), mRNA
gi|261490689|ref|NM_001101927.2|	19.78	9.65	-1.03544	6.93496e-06	4.26222e-05	Bos taurus solute carrier family 15, member 4 (SLC15A4), mRNA
gi|122692304|ref|NM_001080227.1|	21.98	10.73	-1.03454	2.12824e-06	1.43921e-05	Bos taurus ADP-ribosylation factor GTPase activating protein 2 (ARFGAP2), mRNA
gi|156121152|ref|NM_001102254.1|	38.04	18.59	-1.03299	4.47714e-10	5.09474e-09	Bos taurus nuclear receptor coactivator 7 (NCOA7), mRNA
gi|77735746|ref|NM_001034400.1|	33.65	16.45	-1.03252	4.5717e-09	4.57017e-08	Bos taurus actin-related protein 10 homolog (S. cerevisiae) (ACTR10), mRNA
gi|29135328|ref|NM_177516.1|	158.43	77.59	-1.0299	4.72272e-37	2.27681e-35	Bos taurus glutathione S-transferase pi 1 (GSTP1), mRNA
gi|125991905|ref|NM_001081597.1|	13.86	6.79	-1.02944	0.000184391	0.000841012	Bos taurus melanophilin (MLPH), mRNA
gi|118601761|ref|NM_001079587.1|	70.67	34.68	-1.02699	2.4753e-17	6.2524e-16	Bos taurus zinc finger, FYVE domain containing 21 (ZFYVE21), mRNA
gi|62988317|ref|NM_001017952.1|	14.2	6.97	-1.02666	0.000158608	0.000731228	Bos taurus LSM1 homolog, U6 small nuclear RNA associated (S. cerevisiae) (LSM1), mRNA
gi|73853765|ref|NM_175825.3|	16.74	8.22	-1.02609	4.12174e-05	0.000216645	Bos taurus glutathione S-transferase M1 (GSTM1), mRNA
gi|160425240|ref|NM_001110772.1|	26.55	13.05	-1.02466	2.3511e-07	1.83804e-06	Bos taurus Rho GTPase activating protein 18 (ARHGAP18), mRNA
gi|31343049|ref|NM_174010.2|	156.9	77.24	-1.02243	2.61946e-36	1.22977e-34	Bos taurus CD36 molecule (thrombospondin receptor) (CD36), mRNA
gi|139949171|ref|NM_001083690.1|	24.69	12.16	-1.02178	6.56148e-07	4.82664e-06	Bos taurus carbonic anhydrase VIII (CA8), mRNA
gi|115497583|ref|NM_001075884.1|	17.42	8.58	-1.0217	3.05792e-05	0.000164885	Bos taurus ligand of numb-protein X 2 (LNX2), mRNA
gi|88319945|ref|NM_176638.4|	49.37	24.32	-1.02149	1.84103e-12	2.69308e-11	Bos taurus caspase 4, apoptosis-related cysteine peptidase (CASP4), mRNA
gi|84000126|ref|NM_001038079.1|	30.1	14.84	-1.02027	4.06582e-08	3.54997e-07	Bos taurus ADP-ribosylation factor-like 2 (ARL2), mRNA
gi|31343569|ref|NM_175806.2|	62.73	30.93	-1.02015	2.12078e-15	4.71887e-14	Bos taurus ATPase, H+ transporting, lysosomal accessory protein 1 (ATP6AP1), mRNA
gi|78045550|ref|NM_001035076.1|	274.58	135.52	-1.01872	7.14828e-62	4.93066e-60	Bos taurus transmembrane protein 59 (TMEM59), mRNA
gi|157074039|ref|NM_001103261.1|	48.53	23.96	-1.01825	3.27672e-12	4.64176e-11	Bos taurus mannosyl (alpha-1,3-)-glycoprotein beta-1,4-N-acetylglucosaminyltransferase, isozyme B (MGAT4B), mRNA
gi|148222249|ref|NM_001098132.1|	88.26	43.62	-1.01677	6.09254e-21	1.80303e-19	Bos taurus solute carrier family 39 (zinc transporter), member 13 (SLC39A13), mRNA
gi|156121256|ref|NM_001102306.1|	42.95	21.28	-1.01316	6.80128e-11	8.44696e-10	Bos taurus eukaryotic translation initiation factor 4E family member 3 (EIF4E3), mRNA
gi|122692386|ref|NM_001080347.1|	18.77	9.3	-1.01313	1.68425e-05	9.5829e-05	Bos taurus hypothetical protein LOC783068 (MGC151567), mRNA
gi|94967003|ref|NM_001040606.1|	37.87	18.77	-1.01263	9.23024e-10	1.01183e-08	Bos taurus 2',5'-oligoadenylate synthetase 1, 40/46kDa (OAS1), mRNA
gi|78369644|ref|NM_001035440.1|	292.84	145.18	-1.01227	3.3065e-65	2.35313e-63	Bos taurus SH3 domain binding glutamic acid-rich protein like (SH3BGRL), mRNA
gi|147902460|ref|NM_001098106.1|	19.44	9.65	-1.01043	1.25037e-05	7.35698e-05	Bos taurus basic transcription factor 3-like 4 (BTF3L4), mRNA
gi|31342153|ref|NM_174383.2|	105.84	52.56	-1.00985	1.51732e-24	5.33562e-23	Bos taurus lysyl oxidase-like 1 (LOXL1), mRNA
gi|118601767|ref|NM_001079590.1|	16.91	8.4	-1.00942	4.7679e-05	0.000245994	Bos taurus chromosome 18 open reading frame 21 ortholog (C24H18orf21), mRNA
gi|75832127|ref|NM_001025326.2|	143.21	71.16	-1.00899	1.33477e-32	5.81012e-31	Bos taurus serglycin (SRGN), mRNA
gi|60592979|ref|NM_001012677.1|	831.36	413.36	-1.00807	2.19806e-180	2.23977e-178	Bos taurus major histocompatibility complex, class II, DR alpha (HLA-DRA), mRNA
gi|153791207|ref|NM_001080729.1|	34.49	17.16	-1.00713	6.08566e-09	5.98357e-08	Bos taurus immunoglobulin superfamily containing leucine-rich repeat (ISLR), mRNA
gi|115497767|ref|NM_001075224.1|	28.74	14.3	-1.00704	1.12529e-07	9.20662e-07	Bos taurus protein phosphatase 1, regulatory (inhibitor) subunit 13 like (PPP1R13L), mRNA
gi|31343219|ref|NM_173940.2|	23.33	11.62	-1.00558	1.82761e-06	1.2491e-05	Bos taurus myxovirus (influenza virus) resistance 1, interferon-inducible protein p78 (mouse) (MX1), mRNA
gi|157168340|ref|NM_001103253.1|	70.34	35.04	-1.00534	1.02896e-16	2.50046e-15	Bos taurus jun D proto-oncogene (JUND), mRNA
gi|148223244|ref|NM_001098139.1|	44.13	21.99	-1.00491	5.0651e-11	6.31693e-10	Bos taurus solute carrier family 44, member 2 (SLC44A2), mRNA
gi|31342859|ref|NM_174096.2|	14.71	7.33	-1.00491	0.00015783	0.000728015	Bos taurus DnaJ (Hsp40) homolog, subfamily C, member 12 (DNAJC12), mRNA
gi|77735448|ref|NM_001034247.1|	24.01	11.98	-1.00301	1.35962e-06	9.57716e-06	Bos taurus growth arrest and DNA-damage-inducible, alpha (GADD45A), mRNA
gi|155371822|ref|NM_001101045.1|	111.42	55.6	-1.00285	1.76034e-25	6.33934e-24	Bos taurus zinc finger, AN1-type domain 5 (ZFAND5), mRNA
gi|77736374|ref|NM_001034715.1|	21.13	10.55	-1.00205	5.9432e-06	3.70088e-05	Bos taurus membrane-associated ring finger (C3HC4) 5 (MARCH5), mRNA
gi|115495650|ref|NM_001075552.1|	67.97	33.97	-1.00064	4.2999e-16	1.00409e-14	Bos taurus phosphoinositide-3-kinase interacting protein 1 (PIK3IP1), mRNA
gi|118150921|ref|NM_001077911.1|	49.71	24.85	-1.00029	3.73888e-12	5.27977e-11	Bos taurus strawberry notch homolog 2 (Drosophila) (SBNO2), mRNA
